1 **Title:** A Virtual Nodule Environment (ViNE) for modelling the inter-kingdom metabolic  
2 integration during symbiotic nitrogen fixation

3

4 **Authors:** George C diCenzo<sup>1,2</sup>, Michelangelo Tesi<sup>1</sup>, Thomas Pfau<sup>3</sup>, Alessio Mengoni<sup>1\*</sup>, and  
5 Marco Fondi<sup>1\*</sup>

6

7 **Affiliations:** <sup>1</sup> Department of Biology, University of Florence, Sesto Fiorentino, Italy

8 <sup>2</sup> Department of Biology, Queen's University, Kingston, Ontario, Canada

9 <sup>3</sup> Life Sciences Research Unit, University of Luxembourg, Belvaux, Luxembourg

10

11 \* **Corresponding authors:** Alessio Mengoni ([alessio.mengoni@unifi.it](mailto:alessio.mengoni@unifi.it)) and Marco Fondi  
12 ([marco.fondi@unifi.it](mailto:marco.fondi@unifi.it))

13

14 **Keywords:** Symbiotic nitrogen fixation, legume root nodule, rhizobia, *Medicago*,  
15 *Sinorhizobium*, metabolism, constraint-based modelling, flux balance analysis, holobiont

16  
17  
18  
19  
20  
21  
22  
23  
24  
25  
26  
27  
28  
29  
30  
31  
32  
33  
34  
35  
36  
37

## ABSTRACT

Biological associations are often premised upon metabolic cross-talk between the organisms, with the N<sub>2</sub>-fixing endosymbiotic relationship between rhizobia and leguminous plants being a prime example. Here, we report the *in silico* reconstruction of a metabolic network of a *Medicago truncatula* plant nodulated by the bacterium *Sinorhizobium meliloti*. The nodule tissue of the model contains five spatially distinct developmental zones and encompasses the metabolism of both the plant and the bacterium. Flux balance analysis (FBA) suggested that the majority of the metabolic costs associated with symbiotic nitrogen fixation are directly related to supporting nitrogenase activity, while a minority is related to the formation and maintenance of nodule and bacteroid tissue. Interestingly, FBA simulations suggested there was a non-linear relationship between the rate of N<sub>2</sub>-fixation per gram of nodule and the rate of plant growth; increasing the N<sub>2</sub>-fixation efficiency was associated with diminishing returns in terms of plant growth. Evaluating the metabolic exchange between the symbiotic partners provided support for: i) differentiating bacteroids having access to sugars (e.g., sucrose) as a major carbon source, ii) ammonium being the major nitrogen export product of N<sub>2</sub>-fixing bacteria, and iii) N<sub>2</sub>-fixation being dependent on the transfer of protons from the plant cytoplasm to the bacteria through acidification of the peribacteroid space. Our simulations further suggested that the use of C<sub>4</sub>-dicarboxylates by N<sub>2</sub>-fixing bacteroids may be, in part, a consequence of the low concentration of free oxygen in the nodule limiting the activity of the plant mitochondria. These results demonstrate the power of this integrated model to advance our understanding of the functioning of legume nodules, and its potential for hypothesis generation to guide experimental studies and engineering of symbiotic nitrogen fixation.

38

## INTRODUCTION

39 Macroorganisms are colonized by a staggering diversity of microorganisms, collectively  
40 referred to as a ‘holobiont’ (1, 2). The intimate association between organisms is often driven  
41 by metabolic exchanges: many insects obtain essential nutrients from obligate bacterial  
42 symbionts (3), most plants can obtain phosphorus from arbuscular mycorrhiza in exchange for  
43 carbon (4), and the gut microbiota is thought to contribute to animal nutrition (5, 6). Complex  
44 global patterns often emerge during these intimate biological associations (7), especially when  
45 nutritional inter-dependencies are involved (8-10). The communication between the two  
46 metabolic networks of the interacting organisms may give rise to unpredicted phenotypic traits  
47 and unexpected emergent properties. Metabolic relationships can span over a large taxonomic  
48 range and have profound biological relevance (11-14). For example, the interactions between  
49 bacteria and multicellular organisms have been suggested to be key drivers of evolutionary  
50 transitions, leading to eukaryotic diversification and to the occupancy of novel niches (9, 15,  
51 16). The study of the association of two biological entities is mainly challenged by the size of  
52 the system and by the unpredictability of their metabolic interactions. Theoretical, systems-  
53 level models are required to unravel the intimate functioning of metabolic associations and  
54 eventually exploit their potential in biotechnological applications.

55 Symbiotic nitrogen fixation (SNF) is a paradigmatic example of the importance and the  
56 complexity of natural biological associations. SNF is a mutualistic relationship between a  
57 group of plant families, including the Fabaceae, and a polyphyletic group of alpha- and beta-  
58 proteobacteria known as rhizobia, or a taxa of Actinobacteria (*Frankia* spp.), in which the  
59 plants provide a niche and carbon to the bacteria in exchange for fixed nitrogen (17). SNF  
60 involves constant metabolic cross-talk between the plant and the bacteria (18), and it is a  
61 paradigmatic example of bacterial cellular differentiation (19) and sociomicrobiological  
62 interactions (20). The rhizobia intra-cellularly colonize plant cells of a specialized organ known  
63 as a root (or stem) nodule. The intra-cellular rhizobia (referred to as bacteroids) are surrounded  
64 by a plant derived membrane, and the term symbiosome is used in reference to the structure  
65 consisting of the bacteroid, the plant derived membrane (i.e., the peribacteroid membrane), and  
66 the intervening space (i.e., the peribacteroid space). Nodules with an indeterminate structure,  
67 such as those formed by the plant *Medicago truncatula*, are divided into spatially distinct  
68 developmental zones (21) with a distal apical meristem and a proximal nitrogen fixation zone.

69 SNF plays a key role in the global nitrogen cycle and is central to sustainable agricultural  
70 practices by reducing the usage of synthetic nitrogen fertilizers whose application results in a  
71 multitude of adverse environmental consequences (22-24). Unfortunately, our ability to  
72 maximize the benefit of SNF is limited since rhizobial inoculants are often poorly effective due  
73 to low competitiveness (25, 26) and because rhizobium symbioses are specific to leguminous  
74 plants. Manipulating the rhizobium – legume interaction for biotechnological purposes will  
75 require an understanding of what we know and what we don’t know, as well as an ability to  
76 predict the consequences of genetic changes and environmental perturbations.

77 From a metabolic perspective, genome-scale metabolic reconstruction (GENREs) and  
78 constraint-based modelling has great potential to fulfill these roles. A GENRE also serves as a  
79 comprehensive knowledgebase of an organism’s metabolism, containing hundreds to  
80 thousands of metabolic and transport reactions, most of which are linked to the corresponding  
81 gene(s) whose gene product(s) catalyzes the reaction (27, 28). With the aid of mathematical

82 approaches such as flux balance analysis (FBA), GENREs can be used to identify emergent  
83 system-level properties, to predict active reactions, and to identify essential genes (29).  
84 Compared to simple enrichment analyses that are typical in -omics studies, GENRE-based  
85 methods allow for the interpretation of data in a connected manner based on network topology  
86 and to infer the effects of changes in remote pathways on the overall cell physiology. When  
87 considering interacting entities, for example, this approach can predict the consequence of  
88 mutations in one organism on the metabolism of the other. However, multi-organism metabolic  
89 reconstructions are still in their infancy, and very few examples of combined models exist  
90 compared to single strain GENREs (8, 14, 30-32).

91 Despite the importance of metabolism to SNF (18), there has been limited use of  
92 metabolic modelling in the study of rhizobia and SNF. To date, GENREs of varying quality  
93 have been reported for only three rhizobia: *Sinorhizobium meliloti* (33-35), *Rhizobium etli* (36-  
94 38), and *Bradyrhizobium diazoefficiens* (39). Currently, *M. truncatula* (40) and *Glycine max*  
95 (41) are the only legumes with published GENREs. With the exception of the *G. max* GENRE,  
96 these GENREs have been used in preliminary analyses of SNF, providing results generally  
97 consistent with expectations. However, all analyses to date suffer from two major limitations.  
98 Simulations with the rhizobium models ignore plant metabolism, while simulations with the  
99 *M. truncatula* GENRE involved a very limited draft *S. meliloti* metabolic reconstruction.  
100 Furthermore, all simulations have focused on the final stage of SNF and have not considered  
101 the different steps of the preceding developmental progression where metabolism remains  
102 poorly understood (18).

103 Here, we report a holistic *in silico* representation of the integrated metabolism of the  
104 holobiont consisting of a *M. truncatula* plant nodulated by *S. meliloti*, which we refer to as a  
105 Virtual Nodule Environment (ViNE). Our combined, multi-compartment reconstruction  
106 accounts for the metabolic activity of shoot and root tissues together with a nodule consisting  
107 of five developmental zones. We report initial characterizations of ViNE using FBA, including  
108 zone-specific metabolic properties, trade-offs between nitrogen-fixation and plant growth, and  
109 the usage of dicarboxylates as a carbon source by bacteroids. Going forward, we expect ViNE  
110 will provide a powerful platform for hypothesis generation aimed at understanding and  
111 quantitatively evaluating SNF, as well as guiding attempts at engineering SNF for increased  
112 symbiotic efficiency.

113

114

## MATERIALS AND METHODS

### 115 **Preparing an improved *S. meliloti* metabolic reconstruction.**

116 A new *S. meliloti* metabolic reconstruction was built using the existing core metabolic  
117 reconstruction iGD726 (34) as a starting point. First, the biomass composition was updated as  
118 summarized in Table S1. In particular, glycogen was reduced to 0.1% cell dry weight (CDW),  
119 poly-hydroxybutyrate was reduced to 1% CDW, and high and low molecular weight  
120 succinoglycan were reduced to 0.1% and 0.4% CDW, respectively (42). Additionally,  
121 putrescine and spermidine were added to the biomass composition at trace concentrations (43).

122 The working reconstruction was manually expanded to contain accessory metabolic  
123 pathways following our previously reported workflow (34). Briefly, the reconstruction was  
124 expanded by the addition of one pathway at a time. For each pathway, all reactions were  
125 individually added to the model, the gene associations and reaction equations checked against

126 literature sources, and where possible, each reaction was referenced (see File S2). Reactions  
127 were predominately taken from the previously published *S. meliloti* genome-scale metabolic  
128 reconstruction iGD1575 (33) when possible; otherwise, they were taken from the Kyoto  
129 Encyclopedia of Genes and Genomes (44), MetaCyc (45), ModelSEED (46), or MetaNetX (47)  
130 databases.

131 An automated expansion of the metabolic network was then performed. Using the  
132 ‘tncore\_expand’ function of the Tn-Core Toolbox, all reactions absent in the working  
133 reconstruction but present in the *S. meliloti* genome-scale metabolic reconstruction iGD1575b  
134 (34) were transferred to the working reconstruction. Then, i) all unnecessary ‘source’ reactions  
135 were removed, ii) most metabolic reactions associated with an unknown gene were removed,  
136 and iii) some newly added reactions likely to be incorrect based on published literature were  
137 deleted. Reactions added during the automated expansion sharing a gene in common with an  
138 existing reaction were then manually examined, and in most cases manually removed from the  
139 reconstruction. Then, all reactions producing dead-end metabolites were iteratively removed,

140 The working reconstruction was next mass and charge balanced. Metabolite formulas  
141 and charges were obtained from the MetaNetX database (47) when available; otherwise,  
142 metabolite charges and formulas were manually prepared, using information from the  
143 PubChem database (48) when available. The ‘checkMassChargeBalance’ function of the  
144 COBRA Toolbox was used to identify mass or charge unbalanced reactions, and reaction  
145 equations were manually balanced. Duplicate reactions were identified and removed.

146 An ATP hydrolysis reaction was added to account for non-growth associated  
147 maintenance (NGAM) costs (49), using a NGAM cost of 8.39 mmol ATP h<sup>-1</sup> (g dry weight)<sup>-1</sup>  
148 as reported for *Escherichia coli* (50). A growth associated maintenance (GAM) reaction was  
149 not added as the reconstruction includes transcription and translation reactions. The final  
150 reconstruction, termed iGD1348, contains 1348 genes, 1407 reactions (1164 associated with at  
151 least one gene), and 1160 metabolites (Table S2). The final reconstruction is available in File  
152 S2 in SBML, XLS, and MATLAB COBRA format.

153

#### 154 **Updating the *M. truncatula* metabolic network reconstruction.**

155 The published *M. truncatula* metabolic network reconstruction (40) was built based on the *M.*  
156 *truncatula* genome version Mt3.5v5 (51). Here, the gene associations were updated to  
157 correspond to the annotations of version 5.0, the most recent version of the *M. truncatula*  
158 genome (52). A conversion table was prepared linking the Mt3.5v5 gene names with the  
159 corresponding gene names from the Mt4.0v1 genome annotation (53), which were in turn  
160 associated with the corresponding gene names from the version 5.0 annotation. This conversion  
161 table was prepared based on the information present in i) the ‘Mt3.5-  
162 Mt4.0v1\_conversion\_table.txt’ file available on medicagogenome.org (54), and ii) the  
163 ‘MtrunA17r5.0-ANR-EGN-r1.6.gene-repeat\_region.vs. JCVI-Mt4.0-gene.kgb.synonymy.txt’  
164 file available online at medicago.toulouse.inra.fr/ MtrunA17r5.0-ANR. Next, the published *M.*  
165 *truncatula* SBML model was imported into MATLAB with the ‘importMedicago’ function of  
166 Pfau *et al.* (40). After importing, for genes with a one-to-one match between genome versions,  
167 the existing gene name was replaced with the gene name in the version 5.0 genome annotation.  
168 When multiple genes were combined into a single gene in the version 5.0 annotation, all of the  
169 genes were removed from the model and replaced with the single gene. Genes that were split

170 into multiple genes in the version 5.0 annotation were replaced with all of the new genes using  
171 an ‘or’ association. Genes with no match in the Mt5.0 genome were removed from the model;  
172 reactions constrained upon removing these genes were also deleted unless they were essential  
173 for model growth (i.e., RXN-9944\_H, RXN-7674\_H, and PASTOQUINOL--  
174 PLASTOCYANIN-REDUCTASE-RXN\_H), in which case the corresponding gene also was  
175 not removed.

176 The majority of transport reactions in the original *M. truncatula* metabolic  
177 reconstruction, both between the cell and the external environment and between organelles,  
178 were simple diffusion reactions lacking an energy source such as ATP hydrolysis or proton  
179 cotransport. To limit inappropriate transport between compartments, all single-metabolite  
180 diffusion reactions were modified with the exception of metabolites such as water, gases, and  
181 light. All bidirectional reactions were split into two unidirectional reactions, and each reaction  
182 was modified to require the hydrolysis of 0.25 mol of ATP per mol of transported compound.  
183 The modified reconstruction contains 2522 genes, 2920 reactions (1722 associated with at least  
184 one gene), and 2742 metabolites.

185 The updated *M. truncatula* reconstruction was used to generate a tissue-specific *M.*  
186 *truncatula* model containing shoot and root tissues using the ‘BuildTissueModel’ function of  
187 Pfau *et al.* (40). Reactions to transfer metabolites between the root and shoot tissue were  
188 modified to require the hydrolysis of 0.25 mol of root ATP and 0.25 mol of shoot ATP per mol  
189 of transferred metabolite. The model was then modified to contain unique gene names for those  
190 associated with the shoot tissue and for those associated with the root tissue, following which  
191 all unused genes were removed from the model. Finally, root import reactions for the following  
192 compounds were added in anticipation of integration with the *S. meliloti* model:  $\text{Co}^{2+}$ ,  $\text{MoO}_4^{3-}$ ,  
193  $\text{Mn}^{2+}$ ,  $\text{Zn}^{2+}$ ,  $\text{Ca}^{2+}$ ,  $\text{K}^+$ , and  $\text{Na}^+$ . The final model encompassed root metabolism and shoot  
194 metabolism with appropriate cross-talk between the tissues (40), and all reactions, metabolites,  
195 and genes associated with the shoot contain the prefix ‘Leave\_’, while those associated with  
196 the root contain the prefix ‘Root\_’.

197

### 198 **Reconstructing the metabolism of a nodulated *M. truncatula* plant.**

199 The original full (i.e., non-tissue-specific) *M. truncatula* reconstruction (40) was imported to  
200 MATLAB in COBRA format from SBML format using the ‘readCbModel’ function. The  
201 model was updated to the version 5.0 genome annotations as described in the previously  
202 section, and diffusion reactions were modified to require an energy source as described in the  
203 previous section. The following reactions were then added in preparation for integration with  
204 the *S. meliloti* model: a homocitrate synthase reaction, a biotin source reaction, a  $\text{H}_2$  export  
205 reaction, and import reactions for each of  $\text{N}_2$ ,  $\text{Mn}^{2+}$ ,  $\text{Zn}^{2+}$ ,  $\text{Ca}^{2+}$ ,  $\text{K}^+$ , and  $\text{Na}^+$ . The gene  
206 *MtrunA17Chr1g0213481* was associated with the homocitrate synthase reaction based on  
207 homology to the gene of *Lotus japonicus* (55). At the same time, the *S. meliloti* model was  
208 modified such that fluxes were recorded in  $\mu\text{mol hr}^{-1}$  (g dry weight) $^{-1}$ , with one  $\mu\text{mol}$  of  
209 biomass equalling one g of biomass. This was done to ensure consistency with the units in the  
210 *M. truncatula* model. The *S. meliloti* model contained a single gene for all unknown GPRs (i.e.,  
211 ‘Unknown’) and a single gene for all spontaneous reactions (i.e., ‘Spontaneous’). In  
212 preparation for constraining the nodule, the ‘Unknown’ and ‘Spontaneous’ genes were replaced  
213 with a series of genes each associated with a single reaction.



214 The following strategy was adopted to build a multi-compartment metabolic model  
215 accounting for the metabolic interactions of the two organisms. First, we mapped the two  
216 reconstructions to the same name space using the MetaNetX version 3.1 source files (47). This  
217 step was necessary as the *S. meliloti* model is based on the SEED database (56) and the *M.*  
218 *truncatula* model on the MetaCyc database (45). To minimize the required adjustments, only  
219 the metabolite identifiers of metabolites that were both i) a boundary metabolite in the *S.*  
220 *meliloti* model and ii) a cytoplasmic compound in the *M. truncatula* model were changed to  
221 the corresponding MetaNetX code; these represent the pool of metabolites that can be  
222 exchanged between the organisms. A multi-compartment reconstruction was built that included  
223 the *M. truncatula* model, the *S. meliloti* model, and transport reactions (without gene  
224 associations) that convert the *M. truncatula* cytoplasmic compounds to extra-cellular *S. meliloti*  
225 compounds (e.g., H2O\_C => cpd00001[e]). These reactions represent the transport of  
226 compounds across the peribacteroid membrane, between the *M. truncatula* cytoplasm and the  
227 peribacteroid space of the symbiosome. For each metabolite, two unidirectional transport  
228 reactions were added that each required the hydrolysis of 0.25 mol of plant ATP per mol of the  
229 metabolite of interest. The exception was ammonia; in this case, the transport reaction into the  
230 peribacteroid space was driven by the hydrolysis of 0.25 mol of ATP per mol of ammonia,  
231 while the transport from the peribacteroid space was driven by proton symport (one proton per  
232 one molecule of ammonia). Additionally, protons transferred to the peribacteroid space from  
233 the *M. truncatula* cytoplasm were separated from protons exported by *S. meliloti*; no exchange  
234 of protons between *S. meliloti* and *M. truncatula* was allowed at this stage.

235 Four copies of the integrated *M. truncatula* – *S. meliloti* model were prepared to  
236 represent four distinct developmental zones of the nodule: zone II distal, zone II proximal,  
237 interzone II-III, and the nitrogen-fixing zone III. Additionally, a version of the *M. truncatula*  
238 model prior to integration with *S. meliloti* was included to represent zone I (apical meristem).  
239 In each of the five models, prefixes were added to all reactions, metabolites, and genes to  
240 specify to which zone and which organism the feature belongs (e.g., ‘NoduleIII\_’ and  
241 ‘BacteroidIII\_’). Next, all *S. meliloti* exchange reactions and all *M. truncatula* transport  
242 reactions were deleted in each of the five models. The exception was for nodule zone III, where  
243 the import of N<sub>2</sub> and export of H<sub>2</sub> by *M. truncatula* were not removed. Finally, a single model  
244 was produced that joined the tissue-specific (root and shoot) *M. truncatula* model with the five  
245 nodule zone models as a single COBRA formatted metabolic model. To this model, an  
246 irreversible reaction converting protons in the peribacteroid space to *S. meliloti* periplasmic  
247 protons was added specifically in nodule zone III, thereby allowing the transfer of protons from  
248 *M. truncatula* to *S. meliloti*.

249 At this point, it was necessary to metabolically connect the nodule to the root and to the  
250 external environment. First, for each compound that could be exported by the *M. truncatula*  
251 root tissue, a reaction was added to each of the five nodule zones for the export of that  
252 compound. Then, for all compounds that could be imported by the *M. truncatula* root tissue  
253 (except ammonium and nitrate), a diffusion reaction (without an energy requirement) was  
254 added for the import of the metabolite from the external environment to a general nodule  
255 compound. Next, all compounds were identified that could be transferred between the root and  
256 shoot tissues in either direction. For each of these compounds, a diffusion reaction (without an  
257 energy requirement) was added to convert the compound in the root to a general nodule

258 compound. Then, for each of the general nodule compounds, five irreversible reactions were  
259 added to transfer the general nodule metabolite to each of the nodule zones; each reaction  
260 involved the hydrolysis of 0.25 mol of nodule zone ATP per mol of transported metabolite.  
261 Finally, reactions were added to individually transfer asparagine and glutamine from the *M.*  
262 *truncatula* plant cytoplasm of nodule zone III (the nitrogen-fixing zone) to the root tissue, with  
263 each reaction requiring the hydrolysis of 0.25 mol of root ATP and 0.25 mol of nodule zone III  
264 ATP per mol of metabolite.

265 A series of biomass reactions were added to the combined model. A zone-specific  
266 biomass reaction was added to each of zone II distal, zone II proximal, and interzone II-III by  
267 combining *M. truncatula* and *S. meliloti* biomasses at a 75 : 25 ratio. Biomass of zone I  
268 consisted of only *M. truncatula* biomass. No biomass reaction was added to zone III as the  
269 purpose of this zone was to fix nitrogen. Next, an overall nodule biomass reaction was prepared  
270 by combining zone I, zone II distal, zone II proximal, and interzone IZ biomass at a 5 : 45 : 45  
271 : 5 ratio. A plant biomass reaction was also prepared by combining shoot and root biomass at  
272 a 66.7 : 33.3 ratio. Finally, an overall biomass reaction was prepared that combined plant  
273 biomass with nodule biomass at a 98 : 2 ratio. The overall biomass reaction was set as the  
274 objective function during all FBA simulations unless stated otherwise.

275 All reactions that produced dead-end metabolites were iteratively removed from the  
276 model, followed by the addition of several constraints into the model (the list of the reactions  
277 removed following this procedure are listed in Dataset S1). Maintenance costs, in the form of  
278 ATP hydrolysis, were added to each tissue including the nitrogen-fixing zone III. The  
279 maintenance cost value for the shoot and root tissues were set as described elsewhere (40).  
280 Maintenance costs for plant nodule tissues were based on the shoot plus root maintenance costs  
281 scaled by the percent of biomass that consisted of the given nodule zone. Similarly, the  
282 maintenance costs of the bacteroid nodule tissues were based on a maximum of  $50.4 \mu\text{mol hr}^{-1}$   
283  $^1 (\text{g plant dry weight})^{-1}$ , scaled according to the percent of biomass that consisted of the given  
284 bacteroid zone (this value was chosen as it equals 30% the commonly used value for free-living  
285 *Escherichia coli*). Import of ammonium and nitrate by the root and nodule tissues was turned  
286 off, as was usage of starch as a carbon source in the shoot tissue. The uptake of light was set to  
287  $1000 \mu\text{mol hr}^{-1} (\text{g plant dry weight})^{-1}$ , which is within the range where there is a linear relation  
288 between light and  $\text{CO}_2$  usage (not shown). The total rate of oxygen usage by the plant and  
289 bacterial cells of nodule zone III was limited to  $8.985 \mu\text{mol hr}^{-1} (\text{g plant dry weight})^{-1}$ . This  
290 value was arrived at as follows: i) the total oxygen usage of the entire nodule was limited to  
291  $12.98 \mu\text{mol hr}^{-1} (\text{g plant dry weight})^{-1}$  based on published experimental data (57), ii) plant  
292 growth was optimized, iii) the  $\text{O}_2$  usage of zone III was limited to the  $\text{O}_2$  uptake rate in the  
293 initial analysis, and iv) the constraint on whole nodule  $\text{O}_2$  usage was removed. To force the use  
294 of  $\text{C}_4$ -dicarboxylates by the bacteroids of zone III, reactions for the import of all other carbon  
295 sources into the symbiosomes were deleted. No constraints were pre-set on the transfer of  
296 nutrients from the plant cytosol to the bacteria of zone II distal, zone II proximal, or interzone  
297 IZ. Finally, the upper and lower bounds of all reactions were multiplied by 1000, converting  
298 the units to  $\text{nmol hr}^{-1} (\text{g dry weight})^{-1}$ . This step was necessary to avoid numerical issues when  
299 running GIMME due to low fluxes through the bacteroid reactions.

300 The reaction space of each nodule zone was constrained based on the *M. truncatula* –  
301 *S. meliloti* zone-specific RNA-seq data of Roux and coworkers (58), reanalyzed as described



302 below, to obtain transcript per million (TPM) values. The expression threshold for a gene to be  
303 considered highly expressed was determined separately for each species, and it was equal to  
304 1.1 times the average TPM value across all nodule zones of all genes that had at least one  
305 mapped read in at least one zone. To limit artificial differences between zones due to the choice  
306 to threshold, Kruskal-Wallis tests, followed by post-hoc comparisons, were performed for each  
307 gene to determine statistically significant between-zone expression changes; this was  
308 performed using the ‘agricolae’ package in R (59). If i) the difference between two zones was  
309 not statistically significant, ii) only one of the two zone had an expression value above the  
310 expression threshold, and iii) the value in the second zone was at least 80% of the expression  
311 threshold, then the value of the second zone was modified to be above the expression threshold.  
312 Moreover, as we wished to only constrain the reaction space of the nodule zones, all shoot and  
313 root genes were given artificial values above the expression threshold in order to ensure they  
314 were considered highly expressed.

315 The combined model was constrained using a custom multi-species adaptation of the  
316 gene-centric TIGER (60) implementation of the GIMME algorithm (61), which is available in  
317 the Tn-Core Toolbox (23). In short, GIMME was modified to take multiple gene lists (one list  
318 per species), multiple TPM lists (one list per species), and multiple expression thresholds (one  
319 per species). Genes above the respective expression threshold were considered expressed, and  
320 those below the respective threshold were turned off. A score for each ‘off’ gene was calculated  
321 by subtracting the expression value of each gene from the appropriate threshold. The scores for  
322 the species were then normalized based on the ratio of the expression thresholds. The  
323 normalized values of both species were combined as a single list, and the GIMME algorithm  
324 continued as normal. The growth fraction threshold for GIMME was set to 0.99.

325 The GIMME output was used as the basis to build a constrained and functional  
326 COBRA-formatted model. As the genes identified as ‘on’ following the GIMME analysis were  
327 insufficient to rebuild a working COBRA model, the following pipeline was used. All reactions  
328 active during the GIMME analysis with an absolute flux  $> 1 \times 10^{-6}$  nmol hr<sup>-1</sup> (g dry weight)<sup>-1</sup>  
329 were identified. FASTCORE (epsilon of  $1.01 \times 10^{-6}$ ) was then run using these reactions as the  
330 input core reaction set and the same model used as input for GIMME, but with the lower bound  
331 of the biomass reaction set to 99% of the objective value. A list of protected reactions was  
332 prepared by combining: i) the output reactions of FASTCORE, ii) all reactions that were not  
333 constrained when the genes identified as ‘off’ in the GIMME analysis were deleted from the  
334 input model, iii) all peribacteroid transport reactions, and iv) all reactions for the transfer of  
335 metabolites between tissues. All nodule or bacteroid reactions that were not part of this  
336 protected list were removed from the model, and all genes no longer associated with a reaction  
337 were deleted. The genes associated with each reaction were then refined based on the GIMME  
338 output. For any given reaction, no change was made if all the associated genes were classified  
339 as ‘on’, or if all genes were linked with ‘and’ statements. Otherwise, for reactions with ‘or’  
340 statements, but lacking ‘and’ statements, all genes classified as ‘off’ were removed from the  
341 reaction; if no gene was classified as ‘on’, then all genes were deleted except for the gene with  
342 the highest expression value. For reactions with both ‘or’ and ‘and’ statements, a complex loop  
343 was prepared. Put briefly, a minimal set of genes required for the reaction to be functional was  
344 left associated with the reaction, favouring the inclusion of ‘on’ genes followed by the inclusion  
345 of highly expressed ‘off’ genes. All reactions producing dead-end metabolites were iteratively

346 removed from the model, and all genes no longer associated with a reaction were deleted.

347 Finally, all reaction and metabolite identifiers were updated to MetaNetX codes, where  
348 possible, to maximize consistency throughout the model, and duplicate reactions were deleted.  
349 We refer to this final version of the integrated model as ViNE (for Virtual Nodule  
350 Environment), and it is provided in File S3 as MATLAB COBRA and SBML formatted files.  
351 The unconstrained model of the nodulated plant is also provided in File S3.

352

### 353 **Adding sucrose metabolism to zone III bacteroids in ViNE.**

354 To perform simulations comparing the use of sucrose and C<sub>4</sub>-dicarboxylates as a carbon source  
355 for zone III bacteroids, ViNE was modified as follows. The pipeline for construction of ViNE  
356 as detailed above was rerun with a single change. Prior to running GIMME, reactions for the  
357 import of all carbon sources, except sucrose, into the symbiosomes were deleted. This is in  
358 contrast to the construction of the regular version of ViNE, when the reactions for the import  
359 of all carbon sources, except C<sub>4</sub>-dicarboxylates, into the symbiosomes were deleted. The  
360 resulting model was then combined with ViNE, producing in an enlarged version of ViNE  
361 supplemented with the necessary reactions to allow sucrose to serve as a carbon source for zone  
362 III bacteroids.

363

### 364 **Analysis of the RNA-sequencing data.**

365 The nodule zones in the integrated metabolic model were constrained based on previously  
366 published RNA-seq data (58); however, the data were first re-analyzed using the *M. truncatula*  
367 version 5 genome sequence and annotations. The raw sequencing reads (fastq format; SRA  
368 accession SRP028599) were downloaded from the European Nucleotide Archive database  
369 (62), and all files corresponding to the same replicate of the same zone were concatenated as a  
370 single file, keeping separate files for each mate pair. The *M. truncatula* A17 genome (version  
371 5.0) and the *S. meliloti* Rm2011 genome were downloaded and combined as a single file. The  
372 combined genome was indexed using the bowtie2-build function with default settings (63).  
373 Sequencing reads were mapped to the genome with bowtie2 version 2.2.3 (63), treating reads  
374 as paired-ends and using 20 threads. Output SAM files were sorted by name with samtools sort  
375 version 1.3.1-39-ga9054c7 (64) using 20 threads. Reads per gene were counted using HTseq-  
376 count version 0.6.1p1 (65), with the default alignment score threshold of 10. Each HTseq-count  
377 output table was split into two tables: one for *M. truncatula* and one for *S. meliloti*. TPM values  
378 were calculated for each species-specific output file using a custom Perl script, based on the  
379 total gene length for the *S. meliloti* genes and the total exon length for the *M. truncatula* genes.  
380 Finally, zone-specific average TPM values based the three biological replicates of each zone  
381 were calculated. These values were used to constrain the reaction space of the nodule zones in  
382 the integrated metabolic model.

383

### 384 **Metabolic modelling procedures**

385 Model integration, model manipulations, and FBA simulations were performed in MATLAB  
386 R2016b (mathworks.com) using the SBMLToolbox version 4.1.0 (66), libSBML version  
387 5.13.0 (67), and scripts from the COBRA Toolbox commit 9b10fa1 (68), the TIGER Toolbox  
388 version 1.2.0-beta (60), FASTCORE version 1.0 (69), and the Tn-Core Toolbox version 2.2  
389 (70). The iLOG CPLEX Studio 12.7.1 solver (ibm.com) was used for nearly all FBA

390 simulations; the exception was for preparation of iGD1348, during which the Gurobi version  
391 7.0.1 solver (gurobi.com) was used. The switch to CPLEX was prompted by numerical issues  
392 that were solved by switching solver. All custom scripts used in this study are available through  
393 a GitHub repository ([github.com/diCenzo-GC/ViNE\\_Reconstruction](https://github.com/diCenzo-GC/ViNE_Reconstruction)).

394 Each gene found in multiple tissues or nodule zones was distinguished by a unique gene  
395 name to facilitate tissue-specific gene deletion analysis. When performing global single or  
396 double gene deletion analyses, all versions of the gene were simultaneously deleted followed  
397 by the removal of all constrained reactions. In contrast, zone- or tissue-specific gene deletion  
398 analyses involved deleting just the gene version specific to the zone or tissue of interest. Flux  
399 variability was performed with the requirement that flux through the objective function was at  
400 least 99% the optimal flux. The robustness analysis involved first identifying the approximate  
401 flux range for each reaction in which the plant growth rate was non-zero. Then, for each  
402 reaction, the flux rate of the reaction was set to various values within the previously identified  
403 flux range, and the objective value was maximized. For simulations in which the rate of  
404 nodulation could vary, nodule biomass was removed from the objective reaction and instead  
405 forced through a nodule biomass sink reaction at the appropriate rate; maintenance costs and  
406 oxygen availability were modified accordingly (see Text S1). For simulations comparing the  
407 effect of providing zone III bacteroids sucrose versus C<sub>4</sub>-dicarboxylates as the carbon source,  
408 a modified version of ViNE was prepared as described in the subsection “Adding sucrose  
409 metabolism to zone III bacteroids in ViNE”.

410

411

## RESULTS

### 412 **Validation of iGD1348, an updated *S. meliloti* metabolic reconstruction.**

413 Prior to constructing the integrated plant – bacterium metabolic model, an updated metabolic  
414 reconstruction of *S. meliloti* Rm1021 was prepared as described in the Materials and Methods.  
415 Briefly, the highly refined core metabolic network iGD726 (34) was combined with the  
416 comprehensive accessory metabolism of the genome-scale metabolic network iGD1575 (33).  
417 Most of the reactions were compared against the literature, referenced where possible, and  
418 mass and charge balanced. The updated model consists of 1348 genes (Table S2), and  
419 incorporates information from 240 literature sources (listed in the Excel file of File S1) that  
420 include published transposon-sequencing (Tn-seq) data (34) and Phenotype MicroArray data  
421 (33, 71, 72) for wild-type and mutant strains.

422 Several tests were performed to validate the quality of the newly prepared *S. meliloti*  
423 reconstruction. Flux balance analysis (FBA) was used to simulate growth using glucose or  
424 succinate as the sole source of carbon, with or without the inclusion of an NGAM reaction.  
425 Inclusion of an NGAM reaction resulted in a specific growth rate reduction of ~ 0.043 h<sup>-1</sup> and  
426 0.030 h<sup>-1</sup> for growth with glucose and succinate, respectively. This result confirmed the absence  
427 of energy leaks in iGD1348 that would allow for spontaneous energy production.

428 Using FBA, the ability of *S. meliloti* to catabolize 163 carbon sources to support growth  
429 was predicted with the iGD1348 and iGD1575 models (Dataset S2). As previously reported  
430 (33), simulations with the iGD1575 model correctly predicted growth with 67 of the 85 (79%)  
431 substrates experimentally shown to support growth of *S. meliloti*. Nicely, simulations with the  
432 iGD1348 model correctly predicted growth with 76 of these 85 (89%) substrates, including all  
433 67 that supported growth of the iGD1575 model. This result confirmed that iGD1348

434 incorporates the majority of the accessory metabolism of *S. meliloti*, and that it is a better  
435 representation of total cellular *S. meliloti* metabolism than the previous genome-scale model.

436 Context-specific core metabolic models were extracted from the iGD1348 and  
437 iGD1575 metabolic models through the integration of transposon-sequencing (Tn-seq) data  
438 (34) using Tn-Core (29). The accuracy of the resulting core metabolic models was determined  
439 through comparison with iGD726, a manually prepared core metabolic model of *S. meliloti*  
440 (34). As summarized in Figure 1, the iGD1348 core model displayed greater overlap with the  
441 iGD726 model than did the iGD1575 core model. In particular, of the essential genes in the  
442 iGD726 model, 96% were essential in the iGD1348 core model, whereas only 62% were  
443 essential in the iGD1575 core model (Figure 1B). This result confirmed that the newly prepared  
444 iGD1348 reconstruction better represents the core metabolic network of *S. meliloti* than does  
445 the iGD1575 reconstruction. Overall, these tests confirmed that iGD1348 is a high-quality  
446 representation of *S. meliloti* metabolism, and that it better represents both the core and  
447 accessory metabolic properties of *S. meliloti* strain Rm1021 than does the original iGD1575  
448 model.  
449

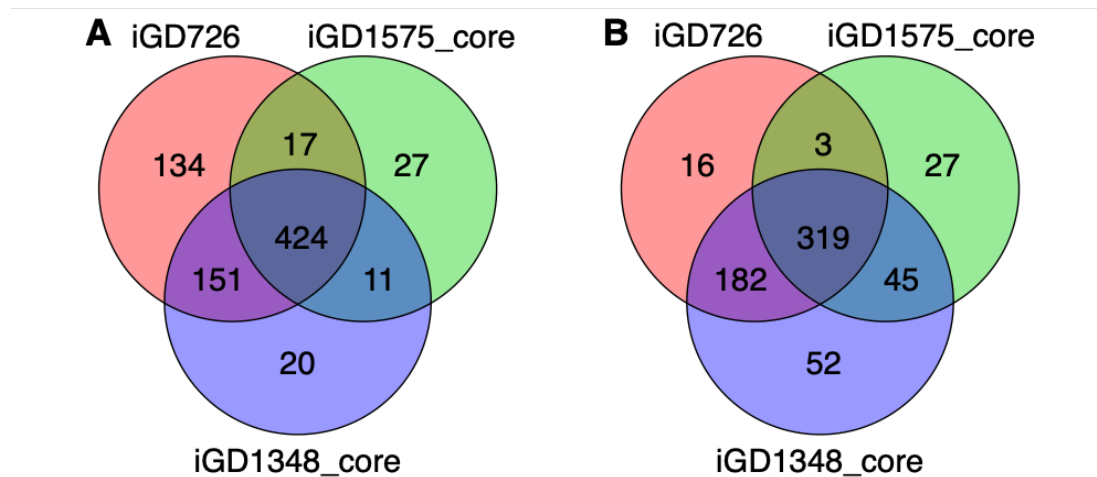

450  
451

452 **Figure 1. Overlap between the iGD726 model and core metabolic models derived from**  
453 **iGD1575 and iGD1348.** Venn diagrams illustrating the overlap in (A) the total gene content,  
454 and (B) the essential genes of the following three models: the manually prepared iGD726 core  
455 model, a core model derived from iGD1575, and a core model derived from iGD1348. Core  
456 models of iGD1575 and iGD1348 were prepared using Tn-Core and published Tn-seq data(34).  
457

458  
459

### 459 **Construction and validation of a metabolic model of a nodulated legume.**

460 As a prerequisite to generating an *in silico* genome-scale metabolic network of an entire  
461 nodulated legume (referred to as ViNE for Virtual Nodule Environment), it was necessary to  
462 obtain high-quality reconstructions of *M. truncatula* and *S. meliloti* metabolism. In the case of  
463 *M. truncatula*, we used a recently published reconstruction that was updated to match the most  
464 recent version of the *M. truncatula* genome annotation (see Materials and Methods). For *S.*  
465 *meliloti*, we made use of the newly updated model described in the previous section and the  
466 Materials and Methods.

467 Integrating the *S. meliloti* and *M. truncatula* metabolic models resulted in a model  
 468 encompassing shoot, root, and nodule tissues as summarized in Figure 2 and Table 1. In total,  
 469 this model includes 746 unique *S. meliloti* genes and 1,327 unique *M. truncatula* genes. Several  
 470 simulations were performed to evaluate the reliability of the model. Using FBA, the maximal  
 471 rate of plant (shoot + root) growth of the nodulated system was predicted to be  $\sim 0.044 \text{ g day}^{-1}$   
 472  $(\text{g plant dry weight})^{-1}$ , which is a reasonable prediction; *Medicago sativa* plants have an  
 473 experimentally determined growth rate of  $\sim 0.1 \text{ g day}^{-1} (\text{g plant dry weight})^{-1}$  (73).  
 474

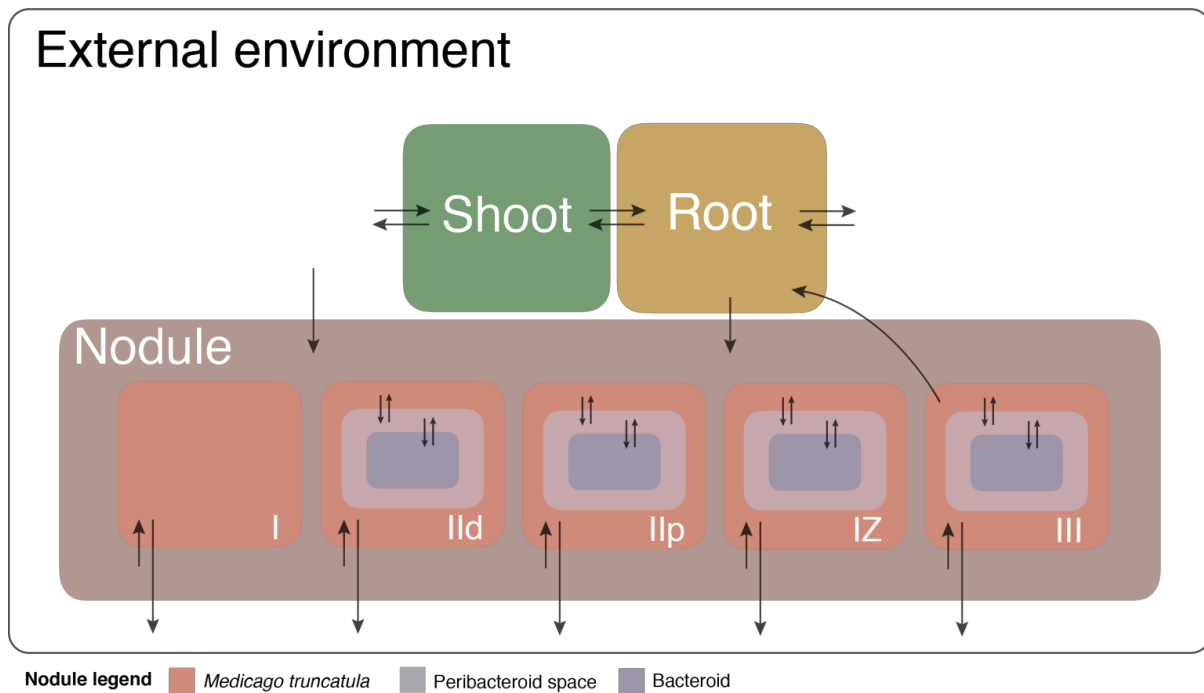

475  
 476

477 **Figure 2. Visual depiction of ViNE.** A schematic summarizing the overall structure of the *S.*  
 478 *meliloti* nodulated *M. truncatula* plant developed in this work. The model contains three plant  
 479 tissues (shoot, root, nodule) with the nodule subdivided into five developmental zones. Arrows  
 480 indicate transport reactions with the direction representative of the directionality of the  
 481 transport reactions. The scale of the figure has no meaning.  
 482

482

483 **Table 1.** Summary properties of ViNE.

| Model feature        | Tissue |      |        |           |           |         |
|----------------------|--------|------|--------|-----------|-----------|---------|
|                      | Shoot  | Root | Zone I | Zone II d | Zone II p | Zone IZ |
| <b>Genes</b>         |        |      |        |           |           |         |
| <i>M. truncatula</i> | 1295   | 1292 | 236    | 265       | 243       | 228     |
| <i>S. meliloti</i>   | 0      | 0    | 0      | 640       | 629       | 638     |
| <b>Reactions *</b>   |        |      |        |           |           |         |
| <i>M. truncatula</i> | 937    | 944  | 494    | 543       | 559       | 530     |
| <i>S. meliloti</i>   | 0      | 0    | 0      | 662       | 654       | 670     |
| <b>Metabolites</b>   |        |      |        |           |           |         |
| <i>M. truncatula</i> | 831    | 825  | 490    | 568       | 597       | 581     |
| <i>S. meliloti</i>   | 0      | 0    | 0      | 751       | 747       | 764     |

484 \* Excludes reactions for transfer of metabolites between tissues or between *M. truncatula* and  
 485 the peribacteroid space.



486 Next, FBA was used to examine the effects of adding exogenous ammonium to the soil on  
487 plant growth considering two situations: i) the rate of N<sub>2</sub>-fixation could vary while the rate of  
488 nodulation was constant, and ii) the rate of nodulation could vary while the rate of N<sub>2</sub>-fixation  
489 per gram of nodule was constant. As expected, increasing the availability of exogenous  
490 ammonium increased the rate of plant growth, with the effect more pronounced when  
491 nodulation was allowed to decrease with increasing ammonium since the plant no longer had  
492 to invest in nodule maintenance (Figure 3).  
493  
494

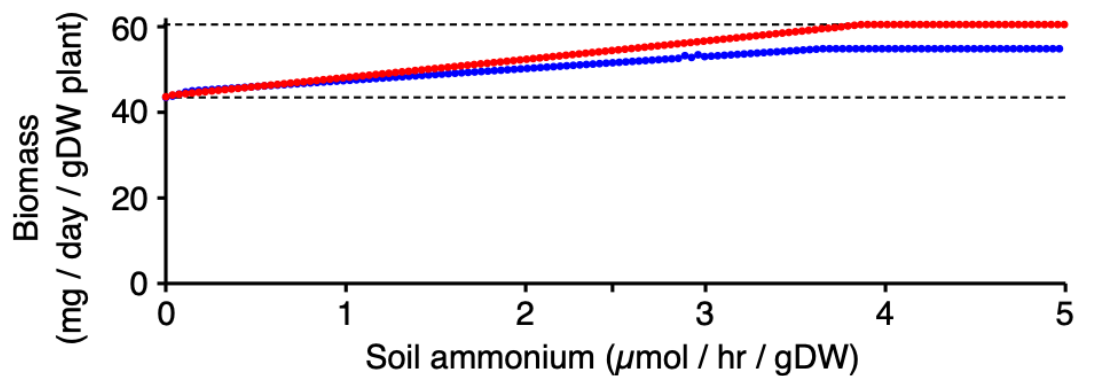

495  
496  
497 **Figure 3. Effect of exogenous ammonium on *M. truncatula* growth.** The effects of  
498 increasing the availability of soil ammonium on the growth rate of nodulated *M. truncatula*  
499 was examined. Simulations were run allowing either the rate of N<sub>2</sub>-fixation to vary while  
500 nodulation remained constant (blue) or allowing the rate of nodulation to vary while the rate of  
501 N<sub>2</sub>-fixation per gram nodule remained constant (red). The dashed lines indicate the maximal  
502 rate of plant growth with exogenous ammonium (upper) and the maximal rate of plant growth  
503 when relying on N<sub>2</sub>-fixation (lower).  
504  
505

506 We then simulated the effects of individual bacteria gene deletion on plant biomass  
507 production (Dataset S3) and compared the results to published experimental data. The model  
508 was able to accurately predict the phenotypes of many *S. meliloti* mutants. For example, *S.*  
509 *meliloti* genes such as *nifH* (nitrogenase), *dctA* (succinate transport), *ilvI* (branched chain amino  
510 acid biosynthesis), *aatA* (aspartate transaminase), *pgk* (phosphoglycerate kinase), and *nrdJ*  
511 (ribonucleotide reductase) were correctly predicted to be essential, while *pyc* (pyruvate  
512 carboxylase), *glnA* (glutamine synthetase), *pckA* (phosphoenolpyruvate carboxykinase), and  
513 *leuB* (leucine biosynthesis) were correctly predicted to be non-essential (74-81). Similarly, the  
514 removal of plant-encoded nodule sucrose synthase, phosphoenolpyruvate carboxylase, and  
515 homocitrate synthase reactions abolished nitrogen fixation, as expected (55, 82, 83). However,  
516 it is important to note that the predictions were not perfect. For example, deleting *argG*  
517 (arginine biosynthesis) or *carA* (carbamoyl phosphate synthase) did not result in the expected  
518 phenotypes, while the incorrect malic enzyme (*tme* instead of *dme*) was predicted to be  
519 essential (84-86). Taken together, these analyses provide support for the general reliability of  
520 ViNE as a representation of nodule metabolism.  
521

## 522 Metabolic progression and nutrient exchange during nodule development

523 The presence of five nodule zones in ViNE provided an opportunity to examine the metabolic  
 524 changes associated with the development of an effective nodule. To accomplish this, FBA was  
 525 used to predict the flux distribution through the integrated metabolic networks of each nodule  
 526 zone, and to simulate the effects of individually deleting each gene, or removing each reaction,  
 527 specifically in a single nodule zone. Additionally, a robustness analysis was performed to  
 528 evaluate how perturbations in the flux of individual bacteroid reactions influence the predicted  
 529 rate of plant growth. The outputs of these analyses are provided as Datasets S4 and S5 and  
 530 summarized in Figures S1 and S2. For simplicity, here we focus on the reaction-level analyses,  
 531 and we split the nodule into only three sections: uninfected (zone I), differentiating (zones IId,  
 532 IIp, and IZ), and nitrogen-fixing (zone III) (Figure 4). Highlighting the overall similarity of  
 533 zones IId, IIp, and IZ, and thus supporting their grouping, the robustness analysis indicated that  
 534 roughly 90% of the bacteroid reactions that had to carry flux in one of these zones had to carry  
 535 flux in all three zones to maximize plant growth.

536  
537

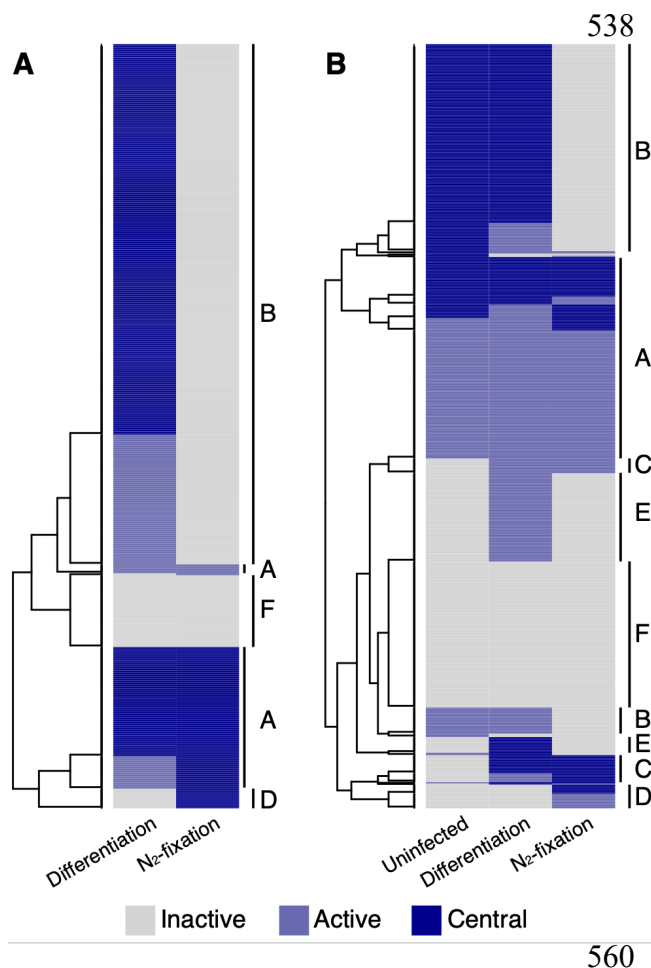

**Figure 4. Nodule zone-specific metabolism.** Heatmaps are presented displaying which reactions are inactive (grey), active but whose removal does not impair plant growth (light blue), or central (dark blue; growth reduction > 10% for the model missing the reaction compared to the full model) in the different nodule zones. In the differentiation zone, reactions are marked as central only if it was central in each of zone IId, IIp, and IZ. Heatmaps are shown for (A) *S. meliloti* reactions and (B) *M. truncatula* reactions. Reactions were clustered using hierarchical clustering, and the following main clusters were identified: A – constitutively active; B – specific to growing cells; C – specific to infected cells; D – specific to the nitrogen-fixation zone; E – specific to the differentiation zone; F – constitutively inactive.

561  
562  
563  
564  
565

The most notable difference comparing the uninfected and differentiation zones was an increase in the number of active reactions related to energy production, including carbon and nucleotide metabolism. This result suggests that the accommodation of differentiating

566 bacteroids may place additional energy demands on the plant cell, and that few additional  
567 metabolic functions are required. In contrast, the transition from the differentiation zone to the  
568 nitrogen fixing zone was associated with a marked decrease in the number of active reactions  
569 in both the plant and bacterial cells, consistent with published transcriptomic and proteomic  
570 datasets (58, 87-89). Highlighting this result, ~ 560 bacteroid reactions had to carry flux in the  
571 differentiation zones to optimize plant growth, whereas only 167 bacteroid reactions had to  
572 carry flux in the N<sub>2</sub>-fixation zone for maximal plant growth.

573 The lack of biomass production in the N<sub>2</sub>-fixation zone meant that most biomass  
574 biosynthetic pathways were predicted to be inactive and non-essential. However, bacterial  
575 pathways related to the production of cofactors for nitrogenase or energy production remained  
576 essential; this included FMN, heme, cobalamin, pyridoxine phosphate, and glutathione  
577 biosynthesis, as well as the pentose phosphate pathway. Similarly, the TCA cycle, oxidative  
578 phosphorylation, and purine biosynthesis in bacteroids were predicted to be essential in the N<sub>2</sub>-  
579 fixation zone, presumably to supply the massive amounts of energy required by nitrogenase.  
580 Biosynthesis of methionine and SAM were also predicted to be essential. Few other notable  
581 bacterial reactions were required in the N<sub>2</sub>-fixation zone (Dataset S4). In the plant  
582 compartment, the majority of the active reactions were related to central carbon metabolism  
583 for the production of energy and C<sub>4</sub>-dicarboxylates for use by the bacteroids, while other active  
584 reactions were involved in the assimilation of ammonium through the formation of glutamine.  
585 Consistent with experimental works [reviewed by (18, 90)], the FBA results indicated that the  
586 plant nodule cells were provided sucrose as a carbon/energy source; in fact, ~ 30% of all carbon  
587 fixed by the plant leaves was sent to nodule zone III. The sucrose was then hydrolyzed and  
588 metabolized to phosphoenolpyruvate, of which ~ 80% was diverted to oxaloacetate through a  
589 cytoplasmic phosphoenolpyruvate carboxykinase reaction for use in the production of C<sub>4</sub>-  
590 dicarboxylates.

591 Next, nutrient exchange between the plant and bacterial partners was examined. While  
592 the prevailing evidence suggests C<sub>4</sub>-dicarboxylates (succinate, malate, fumarate) are the  
593 primary carbon source for N<sub>2</sub>-fixing bacteroids (18, 91-93), the source of carbon for  
594 differentiating bacteroids has not been established. The FBA results suggested that  
595 differentiating bacteroids primarily use sugars, likely sucrose, as a carbon source. This is  
596 consistent with micrographic evidence suggesting that bacterial mutants unable to use C<sub>4</sub>-  
597 dicarboxylates can undergo at least partial differentiation (91, 92). Currently, it is commonly  
598 accepted that nitrogen is primarily exported from bacteroids as ammonia (94, 95); however,  
599 some studies have suggested that L-alanine could be a major nitrogen export product (96, 97).  
600 Here, the FBA simulations were consistent with ammonia being the primary export product in  
601 the *S. meliloti* – *M. truncatula* symbiosis. However, prior to constraining the nodule reaction  
602 space, reducing the availability of oxygen to the bacteroids resulted in a shift in the nitrogen  
603 export product from ammonia to L-alanine. Thus, the detection of L-alanine versus ammonia  
604 as an export product could be due, in part, to differences in experimental set-up that may  
605 influence oxygen availability to the bacteroid. Also, experimental data suggest that rhizobial  
606 biosynthesis of some amino acids are essential for the symbiosis while the biosynthesis of  
607 others are not, and that the phenotypes may be symbiosis-specific [reviewed by (98)].  
608 Similarly, our FBA simulations suggested that rhizobial biosynthesis of approximately half of  
609 the amino acids was essential for the symbiosis.

## 610 Sociobiology of symbiotic nitrogen fixation

611 By containing a representation of an entire nodule, ViNE allowed for an evaluation of the  
612 metabolic costs associated with SNF. Using FBA, the maximal plant growth rate of the  
613 nodulated system (without exogenous ammonium) was estimated to be ~ 72% of the maximal  
614 growth rate of a nodule-free system supplied with non-limiting amounts of exogenous  
615 ammonium (Figure 3, Table 2). The largest factor contributing to the difference in growth was  
616 the direct energetic cost of supporting N<sub>2</sub>-fixation (~ 67% of the difference; Table 2). The  
617 remaining third of the difference was explained by the cost of synthesizing (~ 11% of the  
618 difference) and maintaining (~ 22% of the difference) the nodule and bacteroid tissue (Table  
619 2).

620

621

622 **Table 2.** Contributions of N<sub>2</sub>-fixation and nodulation to the fitness costs of SNF.

| Nitrogen source          | Nodulation state                        | Relative plant growth rate |
|--------------------------|-----------------------------------------|----------------------------|
| N <sub>2</sub> -fixation | Nodulated                               | 0.717                      |
| N <sub>2</sub> -fixation | Nodulated but without maintenance costs | 0.781                      |
| N <sub>2</sub> -fixation | Non-nodulated                           | 0.812                      |
| Exogenous ammonium       | Non-nodulated                           | 1                          |

623

624

625 We next evaluated the relationship between the rate of N<sub>2</sub>-fixation (without modifying  
626 the plant to nodule ratio) and the rate of plant growth. When the rate of N<sub>2</sub>-fixation was below  
627 the optimum, there was a linear relationship between N<sub>2</sub>-fixation and biomass production  
628 (Figure 5A). However, excessive N<sub>2</sub>-fixation quickly resulted in impaired plant growth, with a  
629 10% excess of N<sub>2</sub>-fixation collapsing the symbiosis (Figure 5A). We hypothesized that this  
630 result was due to insufficient energy to support both the excess N<sub>2</sub>-fixation and the ATP  
631 maintenance costs. Consistent with this hypothesis, removing the upper limit on the rate of  
632 zone III oxygen uptake resulted in a gradual decrease in plant growth as the rate of N<sub>2</sub>-fixation  
633 was increased above the optimal (Figure 5A). In this case, excessive N<sub>2</sub>-fixation was less  
634 detrimental than insufficient N<sub>2</sub>-fixation; the effect of increasing the rate of N<sub>2</sub>-fixation by 1  
635  $\mu\text{mol hr}^{-1}$  (g plant dry weight)<sup>-1</sup> increased or decreased the rate of plant growth by 14.7 or 3.4  
636  $\text{mg day}^{-1}$  (g plant dry weight)<sup>-1</sup> when below or above the optimum, respectively. We next  
637 examined the consequences of varying the rate of nodulation (i.e., the ratio between plant and  
638 nodule biomass) while maintaining a constant rate of N<sub>2</sub>-fixation per gram of nodule. The  
639 simulations demonstrated linear relationships between the rate of nodulation and plant growth  
640 both above and below the optimum (Figure 5B), with increasing the percent nodulation  
641 resulting in a 3-fold greater impact when below the optimum compared to above the optimum.  
642 Overall, these simulations suggest that a slightly too efficient symbiosis is preferable (for plant  
643 biomass production) over a slightly inefficient symbiosis, unless the required rate of O<sub>2</sub> usage  
644 exceeds the nodule oxygen diffusion limit.

645

646

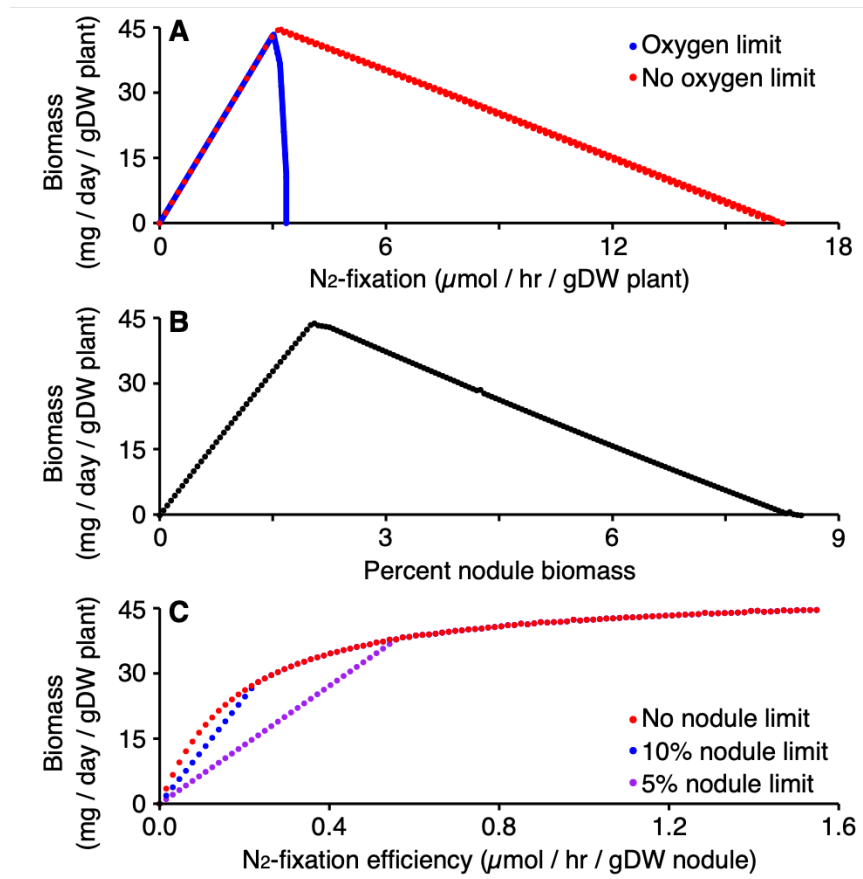

647  
648

649 **Figure 5. Relations between plant growth and rate of N<sub>2</sub>-fixation or nodulation.** (A) Pareto  
650 frontiers showing the relationship between the rate of N<sub>2</sub>-fixation (with a constant ratio between  
651 plant and nodule biomass) and the rate of plant biomass production using ViNE with default  
652 parameters (blue) or no limit on zone III oxygen usage (red). (B) The relationship between the  
653 amount of nodule per plant, expressed as a percent of total (plant + nodule) biomass (with a  
654 constant rate of N<sub>2</sub>-fixation per gram of nodule) and the rate of plant biomass production. (C)  
655 The effect of N<sub>2</sub>-fixation efficiency (rate of N<sub>2</sub>-fixation per gram nodule) on the rate of plant  
656 growth, with the amount of nodule biomass optimized to maximize plant growth and without  
657 a limit on zone III oxygen uptake (see Figure S3 for simulations with an oxygen uptake limit).  
658 Nodule biomass was either uncapped (red) or limited to 10% (blue) or 5% (purple) of the  
659 overall biomass.

660  
661

662 The previous simulations represented simple scenarios where only a single variable  
663 differed. In reality, a change in the efficiency of N<sub>2</sub>-fixation should be accompanied by a  
664 change in the extent of nodulation as a result of legume autoregulation of nodulation (99). We  
665 therefore ran simulations where the efficiency of N<sub>2</sub>-fixation (i.e., the rate of N<sub>2</sub>-fixation per  
666 gram of nodule) was varied and the amount of nodule biomass was optimized to maximize  
667 plant growth. Strikingly, the simulations suggested a pattern of diminishing returns associated  
668 with increasing the efficiency of N<sub>2</sub>-fixation (Figures 5C and S3); decreasing N<sub>2</sub>-fixation  
669 efficiency 50% from the maximum tested value resulted in a mere 10% decrease in plant  
670 growth. The half maximal growth rate was achieved with a N<sub>2</sub>-fixation efficiency of just 10%



671 the maximal, although this required that the nodule accounted for almost 13% of the total  
672 biomass. If we assume an upper limit of nodulation at 10% or 5% of the total biomass, the  
673 benefits of low rates of N<sub>2</sub>-fixation are decreased although the pattern of diminishing returns  
674 remains (Figures 5C and S3). In these cases, half maximal plant growth rate is achieved at 12%  
675 or 21%, respectively, of the highest tested N<sub>2</sub>-fixation efficiency. Overall, these simulations  
676 support that even a poor symbiosis is likely to provide a noticeable benefit to the plant.

677

### 678 **Influence of protons and O<sub>2</sub> on the carbon source provided to N<sub>2</sub>-fixing bacteroids**

679 It is well-established that C<sub>4</sub>-dicarboxylates (malate, succinate, fumarate) are the primary  
680 carbon source provided to nitrogen-fixing zone III bacteroids (18, 91-93); however, the reason  
681 for this remains unclear. We therefore attempted to uncover a metabolic explanation using  
682 ViNE. Surprisingly, preliminary FBA simulations with the ViNE precursor model (i.e., prior  
683 to constraining the reaction space) suggested that the N<sub>2</sub>-fixing bacteroids of zone III use  
684 sucrose, not C<sub>4</sub>-dicarboxylates, as the primary carbon source. Unexpectedly, forcing the use of  
685 C<sub>4</sub>-dicarboxylates resulted in the model being unable to fix nitrogen or produce plant biomass.  
686 During those simulations, protons of the plant cytosol could be transferred to the peribacteroid  
687 space but were not allowed to be used by the N<sub>2</sub>-fixing bacteroids. However, this may not be  
688 realistic since the peribacteroid space of N<sub>2</sub>-fixing bacteroids is acidic due to import of protons  
689 from the plant cytosol (100-102). If the analysis was repeated and the zone III bacteroids were  
690 provided access to the protons of the peribacteroid space, it became possible for C<sub>4</sub>-  
691 dicarboxylates to serve as the primary carbon source and support N<sub>2</sub>-fixation and plant growth.  
692 These results suggest that the plant-driven acidification of the peribacteroid space is essential  
693 for the metabolic functioning of the bacteroid.

694 Although the transfer of protons to the periplasm allowed C<sub>4</sub>-dicarboxylates to support  
695 N<sub>2</sub>-fixation, the rate of plant biomass production nevertheless remained higher when the N<sub>2</sub>-  
696 fixing bacteroids were provided sucrose instead of C<sub>4</sub>-dicarboxylates. To further investigate  
697 this difference, ViNE was modified to contain reactions for the transport and metabolism of  
698 sucrose by N<sub>2</sub>-fixing bacteroids (see Materials and Methods). Consistent with results from the  
699 precursor model, FBA simulations suggested the ability of bacteroids to use sucrose (plus C<sub>4</sub>-  
700 dicarboxylates) increased plant growth rate by 6.4% relative to when bacteroids were supplied  
701 only C<sub>4</sub>-dicarboxylates. ViNE contains a limit on the rate of oxygen uptake by zone III nodule  
702 tissue, restricting nodule and bacteroid metabolism. We wondered whether the use of sucrose  
703 versus C<sub>4</sub>-dicarboxylates may be modulated by the free oxygen concentration of the nodule.  
704 The concentration of free oxygen in the N<sub>2</sub>-fixation zone has been experimentally demonstrated  
705 to be < 50 nM (103). Notably, the K<sub>m</sub> values of the mitochondrial and bacterial terminal  
706 oxidases towards oxygen are 50-100 nM (104, 105) and 7 nM (106), respectively. These  
707 enzyme kinetics suggest that the metabolism of the plant fraction, but not the bacteroid fraction,  
708 of the nodule is likely to be oxygen limited (107, 108), a conclusion that is supported by  
709 measurements of nodule adenylate pools (109). Therefore, we ran a series of simulations in  
710 which the upper limit of the mitochondrial terminal oxidase reaction of zone III was varied,  
711 with no overall limit on the use of oxygen by the nodule. Gradually reducing the flux through  
712 the mitochondrial terminal oxidase was associated with a gradual replacement of sucrose with  
713 C<sub>4</sub>-dicarboxylates as the bacteroid carbon source (Figure 6). This result is consistent with the  
714 hypothesis that the low free oxygen concentration of the N<sub>2</sub>-fixation zone could be a

715 contributing factor to why bacteroids are provided C<sub>4</sub>-dicarboxylates, and not sugars, as the  
716 primary carbon source.

717 Assuming the nodule (consisting primarily of zone III tissue) accounts for 2% of total  
718 plant biomass, and that bacteroid biomass accounts for 25% of nodule biomass, the maximal  
719 rate of predicted C<sub>4</sub>-dicarboxylate import by N<sub>2</sub>-fixing bacteroids (1.3 mmol hr<sup>-1</sup> [g bacteroid  
720 dry weight]<sup>-1</sup>) was similar to experimentally determined uptake rates by *S. meliloti* bacteroids  
721 (1.1 to 1.3 mmol hr<sup>-1</sup> [g bacteroid dry weight]<sup>-1</sup>) (35, 110). Considered together, these  
722 simulations provide evidence that C<sub>4</sub>-dicarboxylates can support optimal plant growth under  
723 physiologically-relevant conditions.

724

725

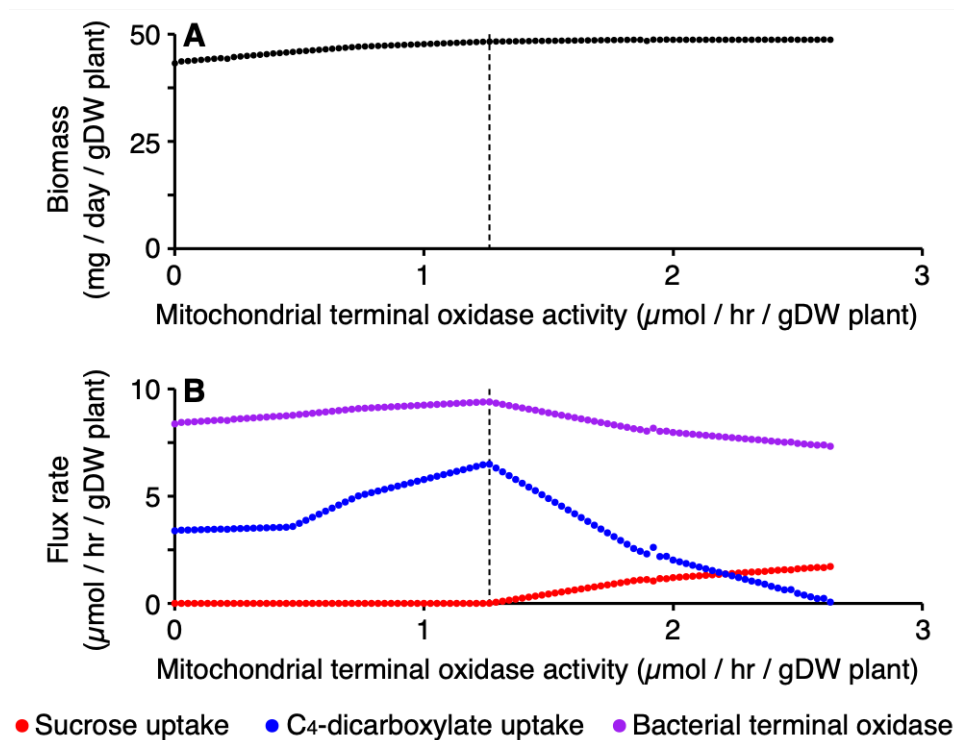

726

727

728 **Figure 6. Effects of limiting the mitochondrial terminal oxidase in the N<sub>2</sub>-fixing zone.** FBA  
729 simulations were run with a modified version of ViNE in which bacteroid metabolism can be  
730 supported by sucrose in addition to C<sub>4</sub>-dicarboxylates. No overall limit on oxygen usage of the  
731 nodule was set during the simulations, but a limit was set on the activity of the mitochondrial  
732 terminal oxidase of the zone III nodule tissue. (A) The effect on plant growth rate of varying  
733 the mitochondrial terminal oxidase of the zone III nodule tissue. (B) The effect on specified  
734 flux rates of varying the mitochondrial terminal oxidase of the zone III nodule tissue. Red –  
735 the flux rate of sucrose uptake by N<sub>2</sub>-fixing bacteroids; blue – the flux rate of C<sub>4</sub>-dicarboxylates  
736 of N<sub>2</sub>-fixing bacteroids; purple – the flux rate of the terminal oxidase of N<sub>2</sub>-fixing bacteroids.  
737 The dashed line indicates the mitochondrial terminal oxidase flux rate below which no sucrose  
738 is used by the bacteroids.

739

740

741

742

## DISCUSSION

743 Models of the integrated metabolism of various holobionts (consisting of a host and its  
744 symbiotic microorganisms) would be valuable tools to understand the emergent properties of  
745 these systems (111, 112). However, to date there are few examples of constraint-based  
746 metabolic modelling being used to study metabolic interactions [e.g., (8, 31)], with this  
747 approach most commonly used to study the human gut microbiome (113). Here, we developed  
748 a broadly adaptable pipeline for modelling the metabolism of interacting organisms across  
749 physiologically distinct tissue (sub)sections. Using metabolic network reconstruction and  
750 constraint-based modelling, we studied the metabolism of a legume root nodule and SNF, a  
751 well-established model of inter-organismal metabolic exchange and cellular differentiation.  
752 Our model (ViNE) accounts for plant shoot, root, and nodule tissues, with the nodule  
753 encompassing the metabolism of both the plant and bacterial partners and subdivided into five  
754 developmental zones. This is an advance over previous attempts at modelling SNF (33, 35-40),  
755 most of which focused solely on bacterial metabolism while treating the plant as a black box.  
756 The increased complexity of ViNE allows for more accurate simulations of the nutrient  
757 exchange, analysis of the metabolic differentiation associated with nodule development,  
758 examination of unexpected emergent properties of the symbiosis resulting from inter-organism  
759 interactions, and for the possibility to perturb the network at the single reactions level. Initial  
760 simulations with ViNE supported that this model does a good job at capturing the metabolism  
761 of a legume nodule. Nevertheless, as with all models, ViNE predictions were imperfect.  
762 However, as we often compared simulated phenotypes for *M. truncatula* with experimental  
763 data for *M. sativa*, and given that rhizobium mutant phenotypes are often plant specific [e.g.,  
764 (114-116)], we cannot rule out that some of the inconsistencies are the result of plant-specific  
765 phenotypes. Going forward, we intend to continue to manually refine and update ViNE to  
766 maximize consistency with experimental observations.

767 FBA simulations with ViNE revealed a pattern of diminishing returns in terms of plant  
768 growth (as a proxy for fitness) as the efficiency of the symbiosis (rate of N<sub>2</sub>-fixation per gram  
769 of nodule) increased, assuming that the amount of nodule biomass per plant could vary (Figure  
770 5C). This observation has potential implications for engineering SNF for biotechnological  
771 applications. It suggests that when developing rhizobial inoculants, maximizing competition  
772 for nodule occupancy may have a greater impact than maximizing the rate of N<sub>2</sub>-fixation. This  
773 result also supports efforts aimed at engineering N<sub>2</sub>-fixing symbiosis with cereals (117) by  
774 highlighting how even a low efficiency symbiosis has the potential to have a noticeable benefit  
775 on crop yield.

776 At the same time, the pattern of diminishing returns is interesting from an evolutionary  
777 perspective (118). In particular, the evolution of N<sub>2</sub>-fixation efficiency may be influenced by  
778 the rhizobium community diversity, assuming that nodule infection increases the fitness of  
779 rhizobia (119). In an environment dominated by a single rhizobium, kin selection may favour  
780 the evolution of a poorly efficient symbiosis as it would increase nodule number and thus the  
781 size of the niche for colonization by the rhizobia. On the other hand, in a highly diverse  
782 environment, evolution of strains capable of entering into a highly efficient symbiosis may be  
783 favoured, as this would lead to fewer nodules and thus less plant resources being allocated to  
784 competing rhizobium strains, thereby limiting the spread of less mutualist (viz. cheater) strains  
785 (20, 120).

786 Of particular interest to us was the metabolic exchange between the plant and rhizobia,  
787 both during N<sub>2</sub>-fixation and during differentiation. The carbon source(s) of differentiating  
788 rhizobia remain poorly understood. Results with ViNE suggested that sucrose may be a major  
789 carbon source for the differentiating bacteroids. However, *S. meliloti* mutants unable to  
790 transport sucrose are not impaired in nodule formation (121), suggesting that differentiating  
791 bacteroids have access to at least one other carbon source. Interestingly, a *S. meliloti pyc* mutant  
792 unable to grow with glycolytic carbon sources was not impaired in differentiation (80).  
793 Similarly, *S. meliloti pckA* (78) and *tpi* (122) mutants unable to grow with gluconeogenic  
794 carbon sources remained capable of differentiating. Thus, it seems likely that differentiating  
795 bacteroids have access to a variety of glycolytic and gluconeogenic carbon substrate, with  
796 sugars possibly serving as the main carbon source in wild type nodules. If so, the restriction of  
797 carbon flow to N<sub>2</sub>-fixing bacteroids to just C<sub>4</sub>-dicarboxylates may be the result of active  
798 remodelling of the peribacteroid membrane during differentiation.

799 In attempting to identify conditions favouring the use of C<sub>4</sub>-dicarboxylates as a carbon  
800 source by N<sub>2</sub>-fixing bacteroids, ViNE also provided insights into the metabolic exchange in the  
801 N<sub>2</sub>-fixation zone. The peribacteroid space of N<sub>2</sub>-fixing bacteroids is known to be acidic due to  
802 the activity of H<sup>+</sup>-ATPases on the peribacteroid membrane (100-102). This acidification  
803 contributes to the import of C<sub>4</sub>-dicarboxylates and the export of ammonium from/to the plant  
804 cytosol and the peribacteroid space (123), and it may contribute to the lysis of non-functional  
805 symbiosomes (124). Our FBA simulations suggest that the plant-derived protons of the  
806 peribacteroid space may also be actively used by the bacteroid to support its metabolism.

807 Although it is generally accepted that nodules are low oxygen environments (103), the  
808 site of O<sub>2</sub>-limitation has been debated. Based on the average concentration of free oxygen in  
809 the nodule, enzyme kinetics data are consistent with the mitochondria being O<sub>2</sub>-limited and the  
810 bacteroids being O<sub>2</sub>-sufficient (103-106). Measurements of the adenylate pools of the plant and  
811 bacterial nodule fractions support this conclusion (109). However, others have argued that  
812 nodule adenylate measurements suggest that bacteroids, not the plant, are O<sub>2</sub>-limited (125).  
813 Similarly, it was suggested that mitochondria cluster near the periphery of the cell near air  
814 pockets, resulting in elevated local O<sub>2</sub> concentrations (126, 127). The FBA results presented  
815 here predicted that C<sub>4</sub>-dicarboxylates are the optimal carbon source for N<sub>2</sub>-fixing bacteroids  
816 only when the plant mitochondria are O<sub>2</sub>-limited while the bacteroids are O<sub>2</sub>-sufficient (Figure  
817 6). This result supports the hypothesis that mitochondria, and not bacteroids, are O<sub>2</sub>-limited in  
818 wild type nodules.

819 In sum, this work presented a complex metabolic model representing the full  
820 metabolism of a rhizobium-nodulated legume, as well as a series of simulations demonstrating  
821 the potential for this model to help address genetic, evolutionary, metabolic, and  
822 sociobiological questions. Future work will be aimed at continuing to refine and improve the  
823 quality of the model, and to using the model to generate hypotheses to guide experimental  
824 studies and to assist in the interpretation of experimental datasets.

825

826

## ACKNOWLEDGEMENTS

827 GCD was supported by a postdoctoral fellowship from the Natural Science and Engineering  
828 Research Council of Canada, and funding from Queen's University. AM was supported by a  
829 grant from Fondazione Cassa di Risparmio di Firenze (project name: Metatrack)

830

## SUPPLEMENTARY MATERIAL

831 **Supplementary File S1:** Additional text, figures and tables.

832 **Text S1.** Simulations involving varying rates of nodulation.

833 **Table S1.** Biomass composition of iGD1348.

834 **Table S2.** Summary properties of the *S. meliloti* metabolic reconstruction iGD1348.

835 **Figure S1.** Nodule zone-specific analysis of essential metabolism.

836 **Figure S2.** Bacteroid robustness analysis summary.

837 **Supplementary File S2:** SBML, XLS, and MATLAB COBRA formats of the *S. meliloti*  
838 updated metabolic reconstruction (iGD1348) used to generate the ViNE.

839 **Supplementary File S3:** SBML, XLS, and MATLAB COBRA formats of the ViNE metabolic  
840 reconstruction.

841 **Dataset S1:** The list of the reactions excluded from the model following dead-end metabolites  
842 removal

843 **Dataset S2:** Comparison of experimental and predicted *S. meliloti* growth phenotypes.

844 **Dataset S3:** The effects of individual bacteria gene deletion on plant biomass production

845 **Dataset S4:** Nodule zone-specific gene deletion and reaction removal analyses

846 **Dataset S5:** Bacteroid robustness analysis.



847

## REFERENCES

- 848 1. K. R. Theis et al., Getting the hologenome concept right: an eco-evolutionary  
849 framework for hosts and their microbiomes. *mSystems* **1**, e1002226 (2016).
- 850 2. P. Vandenkoornhuysse, A. Quaiser, M. Duhamel, A. Le Van, A. Dufresne, The  
851 importance of the microbiome of the plant holobiont. *New Phytol.* **206**, 1196–1206  
852 (2015).
- 853 3. J. P. McCutcheon, B. R. McDonald, N. A. Moran, Convergent evolution of metabolic  
854 roles in bacterial co-symbionts of insects. *Proc. Natl. Acad. Sci. U.S.A.* **106**, 15394–  
855 15399 (2009).
- 856 4. S. E. Smith, I. Jakobsen, M. Grønland, F. A. Smith, Roles of arbuscular mycorrhizas  
857 in plant phosphorus nutrition: interactions between pathways of phosphorus uptake in  
858 arbuscular mycorrhizal roots have important implications for understanding and  
859 manipulating plant phosphorus acquisition. *Plant Physiol.* **156**, 1050–1057 (2011).
- 860 5. G. den Besten et al., The role of short-chain fatty acids in the interplay between diet,  
861 gut microbiota, and host energy metabolism. *J. Lipid Res.* **54**, 2325–2340 (2013).
- 862 6. A. Heinken et al., Systematic assessment of secondary bile acid metabolism in gut  
863 microbes reveals distinct metabolic capabilities in inflammatory bowel disease.  
864 *Microbiome* **7**, 75–18 (2019).
- 865 7. M. Lu, L. O. Hedin, Global plant-symbiont organization and emergence of  
866 biogeochemical cycles resolved by evolution-based trait modelling. *Nat. Ecol. Evol.* **3**,  
867 239–250 (2019).
- 868 8. M. Fondi, F. Di Patti, A synthetic ecosystem for the multi-level modelling of  
869 heterotroph-phototroph metabolic interactions. *Ecol. Model.* **399**, 13–22 (2019).
- 870 9. I. Opatovsky et al., Modeling trophic dependencies and exchanges among insects'  
871 bacterial symbionts in a host-simulated environment. *BMC Genomics* **19**, 402 (2018).
- 872 10. S. Fabbiano, N. Suárez-Zamorano, M. Trajkovski, Host-microbiota mutualism in  
873 metabolic diseases. *Front. Endocrinol.* **8**, 267 (2017).
- 874 11. C. C. Klein et al., Exploration of the core metabolism of symbiotic bacteria. *BMC*  
875 *Genomics* **13**, 438 (2012).
- 876 12. E. M. Bertrand et al., Phytoplankton-bacterial interactions mediate micronutrient  
877 colimitation at the coastal Antarctic sea ice edge. *Proc. Natl. Acad. Sci. U.S.A.* **112**,  
878 9938–9943 (2015).
- 879 13. S. A. Amin, M. S. Parker, E. V. Armbrust, Interactions between diatoms and bacteria.  
880 *Microbiol. Mol. Biol. Rev.* **76**, 667–684 (2012).
- 881 14. N. Y. D. Ankrah, B. Chouaia, A. E. Douglas, The cost of metabolic interactions in  
882 symbioses between insects and bacteria with reduced genomes. *mBio* **9**, 141 (2018).

- 883 15. I. Zilber-Rosenberg, E. Rosenberg, Role of microorganisms in the evolution of animals  
884 and plants: the hologenome theory of evolution. *FEMS Microbiol. Rev.* **32**, 723–735  
885 (2008).
- 886 16. A. Moya, J. Peretó, R. Gil, A. Latorre, Learning how to live together: genomic insights  
887 into prokaryote-animal symbioses. *Nat. Rev. Genet.* **9**, 218–229 (2008).
- 888 17. F. Mus et al., Symbiotic nitrogen fixation and the challenges to its extension to  
889 nonlegumes. *Appl. Environ. Microbiol.* **82**, 3698–3710 (2016).
- 890 18. M. Udvardi, P. S. Poole, Transport and metabolism in legume-rhizobia symbioses.  
891 *Annu. Rev. Plant Biol.* **64**, 781–805 (2013).
- 892 19. K. E. Gibson, H. Kobayashi, G. C. Walker, Molecular determinants of a symbiotic  
893 chronic infection. *Annu. Rev. Genet.* **42**, 413–441 (2008).
- 894 20. A. Checcucci, G. C. diCenzo, M. Bazzicalupo, A. Mengoni, Trade, diplomacy, and  
895 warfare: the quest for elite rhizobia inoculant strains. *Front. Microbiol.* **8**, 2207 (2017).
- 896 21. J. Vasse, F. De Billy, S. Camut, G. Truchet, Correlation between ultrastructural  
897 differentiation of bacteroids and nitrogen fixation in alfalfa nodules. *J. Bacteriol.* **172**,  
898 4295–4306 (1990).
- 899 22. J. W. Erisman, M. A. Sutton, J. Galloway, Z. Klimont, W. Winiwarter, How a century  
900 of ammonia synthesis changed the world. *Nat. Geosci.* **1**, 636–639 (2008).
- 901 23. G. W. Randall, D. J. Mulla, Nitrate nitrogen in surface waters as influenced by climatic  
902 conditions and agricultural practices. *J. Environ. Qual.* **30**, 337–344 (2001).
- 903 24. I. Shcherbak, N. Millar, G. P. Robertson, Global metaanalysis of the nonlinear  
904 response of soil nitrous oxide (N<sub>2</sub>O) emissions to fertilizer nitrogen. *Proc. Natl. Acad.*  
905 *Sci. U.S.A.* **111**, 9199–9204 (2014).
- 906 25. E. W. Triplett, M. J. Sadowsky, Genetics of competition for nodulation of legumes.  
907 *Annu. Rev. Microbiol.* **46**, 399–422 (1992).
- 908 26. J. G. Streeter, Failure of inoculant rhizobia to overcome the dominance of indigenous  
909 strains for nodule formation. *Can. J. Microbiol.* **40**, 513–522 (1994).
- 910 27. A. M. Feist, M. J. Herrgård, I. Thiele, J. L. Reed, B. Ø. Palsson, Reconstruction of  
911 biochemical networks in microorganisms. *Nat. Rev. Microbiol.* **7**, 129–143 (2009).
- 912 28. C. R. Haggart, J. A. Bartell, J. J. Saucerman, J. A. Papin, Whole-genome metabolic  
913 network reconstruction and constraint-based modeling. *Meth. Enzymol.* **500**, 411–433  
914 (2011).
- 915 29. J. D. Orth, I. Thiele, B. Ø. Palsson, What is flux balance analysis? *Nat. Biotechnol.* **28**,  
916 245–248 (2010).
- 917 30. A. Heinken, S. Sahoo, R. M. T. Fleming, I. Thiele, Systems-level characterization of  
918 a host-microbe metabolic symbiosis in the mammalian gut. *Gut Microbes* **4**, 28–40  
919 (2013).

- 920 31. N. Y. D. Ankrah, J. Luan, A. E. Douglas, Cooperative metabolism in a three-partner  
921 insect-bacterial symbiosis revealed by metabolic modeling. *J. Bacteriol.* **199**, 17  
922 (2017).
- 923 32. S. Y. A. Rodenburg et al., Metabolic model of the *Phytophthora infestans*-tomato  
924 interaction reveals metabolic switches during host colonization. *mBio* **10**, 96 (2019).
- 925 33. G. C. diCenzo et al., Metabolic modelling reveals the specialization of secondary  
926 replicons for niche adaptation in *Sinorhizobium meliloti*. *Nat. Commun.* **7**, 12219  
927 (2016).
- 928 34. G. C. diCenzo et al., Robustness encoded across essential and accessory replicons of  
929 the ecologically versatile bacterium *Sinorhizobium meliloti*. *PLOS Genet.* **14**,  
930 e1007357 (2018).
- 931 35. H. Zhao, M. Li, K. Fang, W. Chen, J. Wang, *In silico* insights into the symbiotic  
932 nitrogen fixation in *Sinorhizobium meliloti* via metabolic reconstruction. *PLOS One* **7**,  
933 e31287 (2012).
- 934 36. O. Resendis-Antonio, J. L. Reed, S. Encarnación, J. Collado-Vides, B. Ø. Palsson,  
935 Metabolic reconstruction and modeling of nitrogen fixation in *Rhizobium etli*. *PLOS*  
936 *Comput. Biol.* **3**, 1887–1895 (2007).
- 937 37. O. Resendis-Antonio, M. Hernández, Y. Mora, S. Encarnación, Functional modules,  
938 structural topology, and optimal activity in metabolic networks. *PLOS Comput. Biol.*  
939 **8**, e1002720 (2012).
- 940 38. O. Resendis-Antonio et al., Systems biology of bacterial nitrogen fixation: high-  
941 throughput technology and its integrative description with constraint-based modeling.  
942 *BMC Syst. Biol.* **5**, 120 (2011).
- 943 39. Y. Yang, X.-P. Hu, B.-G. Ma, Construction and simulation of the *Bradyrhizobium*  
944 *diazoefficiens* USDA110 metabolic network: a comparison between free-living and  
945 symbiotic states. *Mol. Biosyst.* **13**, 607–620 (2017).
- 946 40. T. Pfau et al., The intertwined metabolism during symbiotic nitrogen fixation  
947 elucidated by metabolic modelling. *Sci. Rep.* **8**, 12504 (2018).
- 948 41. T. B. Moreira et al., A genome-scale metabolic model of soybean (*Glycine max*)  
949 highlights metabolic fluxes in seedlings. *Plant Physiol.* **180**, 1912–1929 (2019).
- 950 42. C. Wang et al., Roles of poly-3-hydroxybutyrate (PHB) and glycogen in symbiosis of  
951 *Sinorhizobium meliloti* with *Medicago* sp. *Microbiology* **153**, 388–398 (2007).
- 952 43. V. A. Becerra-Rivera, E. Bergström, J. Thomas-Oates, M. F. Dunn, Polyamines are  
953 required for normal growth in *Sinorhizobium meliloti*. *Microbiology* **164**, 600–613  
954 (2018).
- 955 44. M. Kanehisa, Y. Sato, M. Kawashima, M. Furumichi, M. Tanabe, KEGG as a  
956 reference resource for gene and protein annotation. *Nucleic Acids Res.* **44**, D457–D462  
957 (2016).

- 958 45. R. Caspi et al., The MetaCyc database of metabolic pathways and enzymes. *Nucleic*  
959 *Acids Res.* **46**, D633–D639 (2018).
- 960 46. C. S. Henry et al., High-throughput generation, optimization and analysis of genome-  
961 scale metabolic models. *Nat. Biotechnol.* **28**, 977–982 (2010).
- 962 47. S. Moretti et al., MetaNetX/MNXref--reconciliation of metabolites and biochemical  
963 reactions to bring together genome-scale metabolic networks. *Nucleic Acids Res.* **44**,  
964 D523–6 (2016).
- 965 48. S. Kim et al., PubChem substance and compound databases. *Nucleic Acids Res.* **44**,  
966 D1202–13 (2016).
- 967 49. I. Thiele, B. Ø. Palsson, A protocol for generating a high-quality genome-scale  
968 metabolic reconstruction. *Nat. Protoc.* **5**, 93–121 (2010).
- 969 50. A. M. Feist et al., A genome-scale metabolic reconstruction for *Escherichia coli* K-12  
970 MG1655 that accounts for 1260 ORFs and thermodynamic information. *Mol. Syst.*  
971 *Biol.* **3**, 121 (2007).
- 972 51. N. D. Young et al., The *Medicago* genome provides insight into the evolution of  
973 rhizobial symbioses. *Nature* **480**, 520–524 (2011).
- 974 52. Y. Pecrix et al., Whole-genome landscape of *Medicago truncatula* symbiotic genes.  
975 *Nat. Plants* **4**, 1017–1025 (2018).
- 976 53. H. Tang et al., An improved genome release (version Mt4.0) for the model legume  
977 *Medicago truncatula*. *BMC Genomics* **15**, 312 (2014).
- 978 54. V. Krishnakumar et al., MTGD: The *Medicago truncatula* genome database. *Plant*  
979 *Cell Physiol.* **56**, e1–e1 (2015).
- 980 55. T. Hakoyama et al., Host plant genome overcomes the lack of a bacterial gene for  
981 symbiotic nitrogen fixation. *Nature* **462**, 514–517 (2009).
- 982 56. R. Overbeek et al., The subsystems approach to genome annotation and its use in the  
983 project to annotate 1000 genomes. *Nucleic Acids Res.* **33**, 5691–5702 (2005).
- 984 57. M. P. Anderson, G. H. Heichel, C. P. Vance, Nonphotosynthetic CO<sub>2</sub> fixation by  
985 alfalfa (*Medicago sativa* L.) roots and nodules. *Plant Physiol.* **85**, 283–289 (1987).
- 986 58. B. Roux et al., An integrated analysis of plant and bacterial gene expression in  
987 symbiotic root nodules using laser-capture microdissection coupled to RNA  
988 sequencing. *Plant J.* **77**, 817–837 (2014).
- 989 59. F. de Mendiburu *agricolae: statistical procedures for agricultural research. R*  
990 *package version 1.2-8.* (2017) Available at: [https://CRAN.R-](https://CRAN.R-project.org/package=agricolae)  
991 [project.org/package=agricolae](https://CRAN.R-project.org/package=agricolae).
- 992 60. P. A. Jensen, K. A. Lutz, J. A. Papin, TIGER: Toolbox for integrating genome-scale  
993 metabolic models, expression data, and transcriptional regulatory networks. *BMC Syst*  
994 *Biol* **5**, 147 (2011).

- 995 61. S. A. Becker, B. Ø. Palsson, Context-specific metabolic networks are consistent with  
996 experiments. *PLoS Comput. Biol.* **4**, e1000082 (2008).
- 997 62. N. Silvester et al., The European Nucleotide Archive in 2017. *Nucleic Acids Res.* **46**,  
998 D36–D40 (2017).
- 999 63. B. Langmead, S. L. Salzberg, Fast gapped-read alignment with Bowtie 2. *Nat. Methods*  
1000 **9**, 357–359 (2012).
- 1001 64. H. Li et al., The Sequence Alignment/Map format and SAMtools. *Bioinformatics* **25**,  
1002 2078–2079 (2009).
- 1003 65. S. Anders, P. T. Pyl, W. Huber, HTSeq—a Python framework to work with high-  
1004 throughput sequencing data. *Bioinformatics* **31**, 166–169 (2015).
- 1005 66. S. M. Keating, B. J. Bornstein, A. Finney, M. Hucka, SBMLToolbox: an SBML  
1006 toolbox for MATLAB users. *Bioinformatics* **22**, 1275–1277 (2006).
- 1007 67. B. J. Bornstein, S. M. Keating, A. Jouraku, M. Hucka, LibSBML: an API library for  
1008 SBML. *Bioinformatics* **24**, 880–881 (2008).
- 1009 68. J. Schellenberger et al., Quantitative prediction of cellular metabolism with constraint-  
1010 based models: the COBRA Toolbox v2.0. *Nat. Protoc.* **6**, 1290–1307 (2011).
- 1011 69. N. Vlassis, M. P. Pacheco, T. Sauter, Fast reconstruction of compact context-specific  
1012 metabolic network models. *PLoS Comput. Biol.* **10**, e1003424 (2014).
- 1013 70. G. C. diCenzo, A. Mengoni, M. Fondi, Tn-Core: a toolbox for integrating Tn-seq gene  
1014 essentiality data and constraint-based metabolic modelling. *ACS Synth. Biol.* **8**, 158–  
1015 169 (2019).
- 1016 71. E. G. Biondi et al., Metabolic capacity of *Sinorhizobium (Ensifer) meliloti* strains as  
1017 determined by Phenotype MicroArray analysis. *Appl. Environ. Microbiol.* **75**, 5396–  
1018 5404 (2009).
- 1019 72. G. C. diCenzo, A. M. MacLean, B. Milunovic, G. B. Golding, T. M. Finan,  
1020 Examination of prokaryotic multipartite genome evolution through experimental  
1021 genome reduction. *PLoS Genet.* **10**, e1004742 (2014).
- 1022 73. M. Lötscher, K. Klumpp, H. S. N. Phytologist, Growth and maintenance respiration  
1023 for individual plants in hierarchically structured canopies of *Medicago sativa* and  
1024 *Helianthus annuus*: the contribution of current and old assimilates. *New Phytol.* **164**,  
1025 305–316 (2004).
- 1026 74. R. Dixon, C. Kennedy, A. Kondorosi, V. Krishnapillai, M. Merrick, Complementation  
1027 analysis of *Klebsiella pneumoniae* mutants defective in nitrogen fixation. *Mol. Gen.*  
1028 *Genet.* **157**, 189–198 (1977).
- 1029 75. T. Engelke, D. Jording, D. Kapp, A. Puhler, Identification and sequence analysis of  
1030 the *Rhizobium meliloti* *dctA* gene encoding the C<sub>4</sub>-dicarboxylate carrier. *J. Bacteriol.*  
1031 **171**, 5551–5560 (1989).



- 1032 76. M. de las Nieves Peltzer et al., Auxotrophy accounts for nodulation defect of most  
1033 *Sinorhizobium meliloti* mutants in the branched-chain amino acid biosynthesis  
1034 pathway. *Mol. Plant Microbe Interact.* **21**, 1232–1241 (2008).
- 1035 77. V. K. Rastogi, R. J. Watson, Aspartate aminotransferase activity is required for  
1036 aspartate catabolism and symbiotic nitrogen fixation in *Rhizobium meliloti*. *J.*  
1037 *Bacteriol.* **173**, 2879–2887 (1991).
- 1038 78. T. M. Finan, E. McWhinnie, B. T. Driscoll, R. J. Watson, Complex symbiotic  
1039 phenotypes result from gluconeogenic mutations in *Rhizobium meliloti*. *Mol. Plant*  
1040 *Microbe Interact.* **4**, 386–392 (1991).
- 1041 79. M. E. Taga, G. C. Walker, *Sinorhizobium meliloti* requires a cobalamin-dependent  
1042 ribonucleotide reductase for symbiosis with its plant host. *Mol. Plant Microbe Interact.*  
1043 **23**, 1643–1654 (2010).
- 1044 80. M. F. Dunn, G. Araíza, T. M. Finan, Cloning and characterization of the pyruvate  
1045 carboxylase from *Sinorhizobium meliloti* Rm1021. *Arch. Microbiol.* **176**, 355–363  
1046 (2001).
- 1047 81. F. J. De Bruijn et al., *Rhizobium meliloti* 1021 has three differentially regulated loci  
1048 involved in glutamine biosynthesis, none of which is essential for symbiotic nitrogen  
1049 fixation. *J. Bacteriol.* **171**, 1673–1682 (1989).
- 1050 82. A. Gordon, F. Minchin, C. James, O. Komina, Sucrose synthase in legume nodules is  
1051 essential for nitrogen fixation. *Plant Physiol.* **120**, 867–878 (1999).
- 1052 83. J. Schulze et al., Inhibition of alfalfa root nodule phosphoenolpyruvate carboxylase  
1053 through an antisense strategy impacts nitrogen fixation and plant growth.  
1054 *Phytochemistry* **49**, 341–346 (1998).
- 1055 84. T. K. Kerppola, M. L. Kahn, Symbiotic phenotypes of auxotrophic mutants of  
1056 *Rhizobium meliloti* 104A14. *Microbiology* **134**, 913–919 (1988).
- 1057 85. B. Driscoll, T. M. Finan, NAD<sup>+</sup>-dependent malic enzyme of *Rhizobium meliloti* is  
1058 required for symbiotic nitrogen fixation. *Mol. Microbiol.* **7**, 865–873 (1993).
- 1059 86. B. Driscoll, T. M. Finan, NADP<sup>+</sup>-dependent malic enzyme of *Rhizobium meliloti*. *J.*  
1060 *Bacteriol.* **178**, 2224–2231 (1996).
- 1061 87. D. Capela, C. Filipe, C. Bobik, J. Batut, C. Bruand, *Sinorhizobium meliloti*  
1062 differentiation during symbiosis with alfalfa: a transcriptomic dissection. *Mol. Plant*  
1063 *Microbe Interact.* **19**, 363–372 (2006).
- 1064 88. M. J. Barnett, C. J. Toman, R. F. Fisher, S. R. Long, A dual-genome Symbiosis Chip  
1065 for coordinate study of signal exchange and development in a prokaryote–host  
1066 interaction. *Proc. Natl. Acad. Sci. U.S.A.* **101**, 16636–16641 (2004).
- 1067 89. M. A. Djordjevic, *Sinorhizobium meliloti* metabolism in the root nodule: A proteomic  
1068 perspective. *Proteomics* **4**, 1859–1872 (2004).

- 1069 90. A. Liu, C. A. Contador, K. Fan, H.-M. Lam, Interaction and regulation of carbon,  
1070 nitrogen, and phosphorus metabolisms in root nodules of legumes. *Front. Plant Sci.* **9**,  
1071 1860 (2018).
- 1072 91. C. W. Ronson, P. Lyttleton, J. G. Robertson, C<sub>4</sub>-dicarboxylate transport mutants of  
1073 *Rhizobium trifolii* form ineffective nodules on *Trifolium repens*. *Proc. Natl. Acad. Sci.*  
1074 *U.S.A.* **78**, 4284–4288 (1981).
- 1075 92. T. M. Finan, J. M. Wood, D. C. Jordan, Symbiotic properties of C<sub>4</sub>-dicarboxylic acid  
1076 transport mutants of *Rhizobium leguminosarum*. *J. Bacteriol.* **154**, 1403–1413 (1983).
- 1077 93. M. J. Mitsch, G. C. diCenzo, A. Cowie, T. M. Finan, Succinate transport is not  
1078 essential for symbiotic nitrogen fixation by *Sinorhizobium meliloti* or *Rhizobium*  
1079 *leguminosarum*. *Appl. Environ. Microbiol.* **84**, e01561–17 (2018).
- 1080 94. Y. Li, R. Parsons, D. A. Day, F. J. Bergersen, Reassessment of major products of N<sub>2</sub>  
1081 fixation by bacteroids from soybean root nodules. *Microbiology* **148**, 1959–1966  
1082 (2002).
- 1083 95. S. Kumar, A. Bourdès, P. Poole, De novo alanine synthesis by bacteroids of  
1084 *Mesorhizobium loti* is not required for nitrogen transfer in the determinate nodules of  
1085 *Lotus corniculatus*. *J. Bacteriol.* **187**, 5493–5495 (2005).
- 1086 96. J. K. Waters et al., Alanine, not ammonia, is excreted from N<sub>2</sub>-fixing soybean nodule  
1087 bacteroids. *Proc. Natl. Acad. Sci. U.S.A.* **95**, 12038–12042 (1998).
- 1088 97. D. Allaway et al., Identification of alanine dehydrogenase and its role in mixed  
1089 secretion of ammonium and alanine by pea bacteroids. *Mol. Microbiol.* **36**, 508–515  
1090 (2000).
- 1091 98. M. F. Dunn, Key roles of microsymbiont amino acid metabolism in rhizobia-legume  
1092 interactions. *Crit. Rev. Microbiol.* **41**, 411–451 (2015).
- 1093 99. D. E. Reid, B. J. Ferguson, S. Hayashi, Y.-H. Lin, P. M. Gresshoff, Molecular  
1094 mechanisms controlling legume autoregulation of nodulation. *Ann. Bot.* **108**, 789–795  
1095 (2011).
- 1096 100. M. M. Szafran, H. Haaker, Properties of the peribacteroid membrane ATPase of pea  
1097 root nodules and its effect on the nitrogenase activity. *Plant Physiol.* **108**, 1227–1232  
1098 (1995).
- 1099 101. O. Pierre, G. Engler, J. Hopkins, F. B. Plant, Peribacteroid space acidification: a  
1100 marker of mature bacteroid functioning in *Medicago truncatula* nodules. *Plant Cell*  
1101 *Environ.* **36**, 2059–2070 (2013).
- 1102 102. E. Fedorova et al., Localization of H(+)-ATPases in soybean root nodules. *Planta* **209**,  
1103 25–32 (1999).
- 1104 103. B. J. King, D. B. Layzell, Effect of increases in oxygen concentration during the argon-  
1105 induced decline in nitrogenase activity in root nodules of soybean. *Plant Physiol.* **96**,  
1106 376–381 (1991).

- 1107 104. S. Rawsthorne, T. A. Larue, Preparation and properties of mitochondria from cowpea  
1108 nodules. *Plant Physiol.* **81**, 1092–1096 (1986).
- 1109 105. A. H. Millar, D. A. Day, F. J. Bergersen, Microaerobic respiration and oxidative  
1110 phosphorylation by soybean nodule mitochondria: implications for nitrogen fixation.  
1111 *Plant Cell Environ.* **18**, 715–726 (1995).
- 1112 106. O. Preisig, R. Zufferey, L. Thöny-Meyer, C. A. Appleby, H. Hennecke, A high-affinity  
1113 cbb3-type cytochrome oxidase terminates the symbiosis-specific respiratory chain of  
1114 *Bradyrhizobium japonicum*. *J. Bacteriol.* **178**, 1532–1538 (1996).
- 1115 107. I. J. Oresnik, D. B. Layzell, Composition and distribution of adenylates in soybean  
1116 (*Glycine max* L.) nodule tissue. *Plant Physiol.* **104**, 217–225 (1994).
- 1117 108. B. A. Geddes, I. J. Oresnik The Mechanism of Symbiotic Nitrogen Fixation. *The*  
1118 *Mechanistic Benefits of Microbial Symbionts*, Advances in Environmental  
1119 Microbiology. (Springer, Cham, Cham), pp 69–97. (2016).
- 1120 109. I. J. Oresnik A biochemical basis for oxygen limitation in legume nodules. PhD  
1121 Dissertation (Kingston, Ontario, Canada). (1995).
- 1122 110. D. G. McRae, R. W. Miller, W. B. Berndt, K. Joy, Transport of C<sub>4</sub>-dicarboxylates and  
1123 amino acids by *Rhizobium meliloti* bacteroids. *Mol. Plant Microbe Interact.* **2**, 273–  
1124 278 (1989).
- 1125 111. O. Wolkenhauer, Why model? *Front. Physiol.* **5**, 21 (2014).
- 1126 112. E. Bosi, G. Bacci, A. Mengoni, M. Fondi, Perspectives and challenges in microbial  
1127 communities metabolic modeling. *Front. Genet.* **8**, 88 (2017).
- 1128 113. E. Bauer, I. Thiele, From network analysis to functional metabolic modeling of the  
1129 human gut microbiota. *mSystems* **3**, 359 (2018).
- 1130 114. G. C. diCenzo, M. Zamani, A. Cowie, T. M. Finan, Proline auxotrophy in  
1131 *Sinorhizobium meliloti* results in a plant-specific symbiotic phenotype. *Microbiology*  
1132 **161**, 2341–2351 (2015).
- 1133 115. K. Wippel, S. R. Long, Symbiotic performance of *Sinorhizobium meliloti* lacking  
1134 ppGpp depends on the *Medicago* host species. *Mol. Plant Microbe Interact.* **32**, 717–  
1135 728 (2019).
- 1136 116. G. C. diCenzo, M. Zamani, H. N. Ludwig, T. M. Finan, Heterologous  
1137 complementation reveals a specialized activity for BacA in the *Medicago*-  
1138 *Sinorhizobium meliloti* symbiosis. *Mol. Plant Microbe Interact.* **30**, 312–324 (2017).
- 1139 117. C. Rogers, G. E. D. Oldroyd, Synthetic biology approaches to engineering the nitrogen  
1140 symbiosis in cereals. *J. Exp. Bot.* **65**, 1939–1946 (2014).
- 1141 118. R. F. Denison, E. T. Kiers, Lifestyle alternatives for rhizobia: mutualism, parasitism,  
1142 and forgoing symbiosis. *FEMS Microbio. Lett.* **237**, 187–193 (2004).
- 1143 119. R. F. Denison, E. T. Kiers, Life histories of symbiotic rhizobia and mycorrhizal fungi.  
1144 *Curr. Biol.* **21**, R775–85 (2011).

- 1145 120. A. Checcucci et al., Mixed nodule infection in *Sinorhizobium meliloti*-*Medicago sativa*  
1146 symbiosis suggest the presence of cheating behavior. *Front. Plant Sci.* **7**, 835 (2016).
- 1147 121. J. B. Jensen, N. K. Peters, T. V. Bhuvaneswari, Redundancy in periplasmic binding  
1148 protein-dependent transport systems for trehalose, sucrose, and maltose in  
1149 *Sinorhizobium meliloti*. *J. Bacteriol.* **184**, 2978–2986 (2002).
- 1150 122. N. J. Poysti, I. J. Oresnik, Characterization of *Sinorhizobium meliloti* triose phosphate  
1151 isomerase genes. *J. Bacteriol.* **189**, 3445–3451 (2007).
- 1152 123. M. K. Udvardi, D. A. Day, Metabolite transport across symbiotic membranes of  
1153 legume nodules. *Annu. Rev. Plant Physiol. Plant Mol. Biol.* **48**, 493–523 (1997).
- 1154 124. T. Coba de la Peña, E. Fedorova, J. J. Pueyo, M. M. Lucas, The symbiosome: legume  
1155 and rhizobia co-evolution toward a nitrogen-fixing organelle? *Front. Plant Sci.* **8**, 2229  
1156 (2017).
- 1157 125. M. M. Kuzma et al., The site of oxygen limitation in soybean nodules. *Plant Physiol.*  
1158 **119**, 399–408 (1999).
- 1159 126. P. P. Thumfort, C. A. Atkins, D. B. Layzell, A re-evaluation of the role of the infected  
1160 cell in the control of O<sub>2</sub> diffusion in legume Nodules. *Plant Physiol.* **105**, 1321–1333  
1161 (1994).
- 1162 127. F. J. Bergersen, Distribution of O<sub>2</sub> within infected cells of soybean root nodules: a new  
1163 simulation. *Protoplasma* **183**, 49–61 (1994).
- 1164
- 1165
- 1166
- 1167
